# Supplementary material
Source: MDPI journal article supplement (https://www.mdpi.com/2073-445X/11/5/655)
Supplement: s1 [file s1]

**Supplemental File S1:** Summarized validation data for individual plots at 10, 15, and 20 meters, including a comparison to ground censuses.

| <b>10-meter Validation</b> |        |           |        |               |       |       |           |
|----------------------------|--------|-----------|--------|---------------|-------|-------|-----------|
| Plot Name                  | Marked | Confirmed | Missed | Actual        | EOC   | EOO   | Net Error |
| North Dry Valley F         | 7      | 3         | 4      | 7             | 0.429 | 2.333 | 1.000     |
| North Dry Valley U         | 21     | 11        | 0      | 11            | 0.524 | 1.000 | 0.524     |
| SCWR 2B F                  | 11     | 8         | 4      | 12            | 0.727 | 1.500 | 1.091     |
| SCWR 2B U                  | 6      | 4         | 8      | 12            | 0.667 | 3.000 | 2.000     |
| SCWR 18D F                 | 30     | 17        | 34     | 51            | 0.567 | 3.000 | 1.700     |
| SCWR 18D U                 | 47     | 21        | 35     | 56            | 0.447 | 2.667 | 1.191     |
| SCWR 24 F                  | 29     | 23        | 72     | 95            | 0.793 | 4.130 | 3.276     |
| SCWR 24 U                  | 50     | 44        | 44     | 88            | 0.880 | 2.000 | 1.760     |
| SCWR 24A F                 | 9      | 7         | 10     | 17            | 0.778 | 2.429 | 1.889     |
| SCWR 24A U                 | 18     | 13        | 0      | 13            | 0.722 | 1.000 | 0.722     |
| SCWR 26 F                  | 22     | 14        | 26     | 40            | 0.636 | 2.857 | 1.818     |
| SCWR 26 U                  | 15     | 11        | 15     | 26            | 0.733 | 2.364 | 1.733     |
| Upper Coal Mine U          | 2      | 2         | 0      | 2             | 1.000 | 1.000 | 1.000     |
| Willow Seep Rd F           | 17     | 5         | 45     | 50            | 0.294 | 10.00 | 2.941     |
|                            |        |           |        | <b>Mean</b>   | 0.657 | 2.806 | 1.618     |
|                            |        |           |        | <b>STDERR</b> | 0.049 | 0.582 | 0.202     |
| <b>Totals</b>              | 284    | 183       | 297    | 480           |       |       |           |

| <b>15-meter Validation</b> |        |           |        |               |       |       |           |
|----------------------------|--------|-----------|--------|---------------|-------|-------|-----------|
| Plot Name                  | Marked | Confirmed | Missed | Actual        | EOC   | EOO   | Net Error |
| North Dry Valley F         | 27     | 3         | 4      | 7             | 0.111 | 2.333 | 0.259     |
| North Dry Valley U         | 10     | 4         | 7      | 11            | 0.400 | 2.750 | 1.100     |
| SCWR 2B F                  | 11     | 6         | 6      | 12            | 0.545 | 2.000 | 1.091     |
| SCWR 2B U                  | 11     | 4         | 8      | 12            | 0.364 | 3.000 | 1.091     |
| SCWR 18D F                 | 21     | 3         | 48     | 51            | 0.143 | 17.00 | 2.429     |
| SCWR 18D U                 | 37     | 10        | 46     | 56            | 0.270 | 5.600 | 1.514     |
| SCWR 24 F                  | 13     | 11        | 84     | 95            | 0.846 | 8.636 | 7.308     |
| SCWR 24 U                  | 28     | 22        | 66     | 88            | 0.786 | 4.000 | 3.143     |
| SCWR 24A F                 | 8      | 4         | 13     | 17            | 0.500 | 4.250 | 2.125     |
| SCWR 24A U                 | 17     | 8         | 5      | 13            | 0.471 | 1.625 | 0.765     |
| SCWR 26 F                  | 25     | 3         | 37     | 40            | 0.120 | 13.33 | 1.600     |
| SCWR 26 U                  | 10     | 6         | 20     | 26            | 0.600 | 4.333 | 2.600     |
| Upper Coal Mine U          | 5      | 2         | 0      | 2             | 0.400 | 1.000 | 0.400     |
| Willow Seep Rd F           | 11     | 3         | 47     | 50            | 0.273 | 16.67 | 4.545     |
|                            |        |           |        | <b>Mean</b>   | 0.416 | 6.181 | 2.141     |
|                            |        |           |        | <b>STDERR</b> | 0.059 | 1.425 | 0.486     |
| <b>Totals</b>              | 234    | 89        | 391    | 480           |       |       |           |

| <b>20-meter Validation</b> |        |           |        |               |       |       |           |
|----------------------------|--------|-----------|--------|---------------|-------|-------|-----------|
| Plot Name                  | Marked | Confirmed | Missed | Actual        | EOC   | EOO   | Net Error |
| North Dry Valley F         | 19     | 1         | 6      | 7             | 0.053 | 7.000 | 0.368     |
| North Dry Valley U         | 15     | 2         | 9      | 11            | 0.133 | 5.500 | 0.733     |
| SCWR 2B F                  | 13     | 3         | 9      | 12            | 0.231 | 4.000 | 0.923     |
| SCWR 2B U                  | 6      | 2         | 10     | 12            | 0.333 | 6.000 | 2.000     |
| SCWR 18D F                 | 16     | 2         | 49     | 51            | 0.125 | 25.50 | 3.188     |
| SCWR 18D U                 | 19     | 5         | 51     | 56            | 0.263 | 11.20 | 2.945     |
| SCWR 24 F                  | 25     | 6         | 89     | 95            | 0.240 | 15.83 | 3.800     |
| SCWR 24 U                  | 19     | 12        | 76     | 88            | 0.632 | 7.333 | 4.632     |
| SCWR 24A F                 | 13     | 3         | 14     | 17            | 0.231 | 5.667 | 1.308     |
| SCWR 24A U                 | 9      | 4         | 9      | 13            | 0.444 | 3.250 | 1.444     |
| SCWR 26 F                  | 9      | 1         | 39     | 40            | 0.111 | 40.00 | 4.444     |
| SCWR 26 U                  | 5      | 3         | 23     | 26            | 0.600 | 8.667 | 5.200     |
| Upper Coal Mine U          | 4      | 1         | 1      | 2             | 0.250 | 2.000 | 0.500     |
| Willow Seep Rd F           | 13     | 1         | 49     | 50            | 0.077 | 50.00 | 3.846     |
|                            |        |           |        | <b>Mean</b>   | 0.266 | 13.71 | 2.524     |
|                            |        |           |        | <b>STDERR</b> | 0.047 | 3.781 | 0.433     |
| <b>Totals</b>              | 185    | 46        | 434    | 480           |       |       |           |
