# Supplementary material
Source: MDPI journal article supplement (https://www.mdpi.com/2073-445X/11/5/655)
Supplement: s1 [file s1]

**Supplemental File S3:** Raw data used to conduct logistic regression on the probability of detection relative to cactus diameter (cm). Columns are defined as follows: Site: The name of the macro-plot; ID: The unique identifier for an individual cactus; Altitude: The elevation in meters at which the drone survey was conducted; Size\_Class: The diametric classification of the individual cactus; Detection: Coded with a 1 if the cactus was confirmed in the image, and 0 if it was not; Diameter: The diameter of the cactus in centimeters.

| Site             | ID | Altitude | Size_Class | Detection | Diameter |
|------------------|----|----------|------------|-----------|----------|
| NorthDryValley_F | 1  | 10       | 1          | 0         | 2        |
| NorthDryValley_F | 2  | 10       | 2          | 1         | 4        |
| NorthDryValley_F | 3  | 10       | 3          | 0         | 5        |
| NorthDryValley_F | 4  | 10       | 3          | 1         | 4.5      |
| NorthDryValley_F | 6  | 10       | 3          | 0         | 6        |
| NorthDryValley_F | 7  | 10       | 3          | 0         | 6.5      |
| NorthDryValley_F | 8  | 10       | 3          | 1         | 9        |
| NorthDryValley_F | 1  | 15       | 1          | 0         | 2        |
| NorthDryValley_F | 2  | 15       | 2          | 1         | 4        |
| NorthDryValley_F | 3  | 15       | 3          | 0         | 5        |
| NorthDryValley_F | 4  | 15       | 3          | 1         | 4.5      |
| NorthDryValley_F | 6  | 15       | 3          | 0         | 6        |
| NorthDryValley_F | 7  | 15       | 3          | 0         | 6.5      |
| NorthDryValley_F | 8  | 15       | 3          | 1         | 9        |
| NorthDryValley_F | 1  | 20       | 1          | 0         | 2        |
| NorthDryValley_F | 2  | 20       | 2          | 0         | 4        |
| NorthDryValley_F | 3  | 20       | 3          | 0         | 5        |
| NorthDryValley_F | 4  | 20       | 3          | 0         | 4.5      |
| NorthDryValley_F | 6  | 20       | 3          | 1         | 6        |
| NorthDryValley_F | 7  | 20       | 3          | 0         | 6.5      |
| NorthDryValley_F | 8  | 20       | 3          | 0         | 9        |
| NorthDryValley_U | 9  | 10       | 3          | 1         | 7.5      |
| NorthDryValley_U | 10 | 10       | 3          | 0         | 5        |
| NorthDryValley_U | 11 | 10       | 1          | 0         | 1.5      |
| NorthDryValley_U | 12 | 10       | 2          | 1         | 4        |
| NorthDryValley_U | 13 | 10       | 3          | 1         | 4.5      |
| NorthDryValley_U | 14 | 10       | 3          | 1         | 5.5      |
| NorthDryValley_U | 15 | 10       | 2          | 1         | 3        |
| NorthDryValley_U | 16 | 10       | 3          | 1         | 6        |
| NorthDryValley_U | 17 | 10       | 1          | 1         | 2        |
| NorthDryValley_U | 18 | 10       | 3          | 1         | 6        |
| NorthDryValley_U | 19 | 10       | 3          | 0         | 5        |
| NorthDryValley_U | 9  | 15       | 3          | 1         | 7.5      |
| NorthDryValley_U | 10 | 15       | 3          | 0         | 5        |

|                  |    |    |   |   |     |
|------------------|----|----|---|---|-----|
| NorthDryValley_U | 11 | 15 | 1 | 0 | 1.5 |
| NorthDryValley_U | 12 | 15 | 2 | 0 | 4   |
| NorthDryValley_U | 13 | 15 | 3 | 0 | 4.5 |
| NorthDryValley_U | 14 | 15 | 3 | 0 | 5.5 |
| NorthDryValley_U | 15 | 15 | 2 | 1 | 3   |
| NorthDryValley_U | 16 | 15 | 3 | 1 | 6   |
| NorthDryValley_U | 17 | 15 | 1 | 0 | 2   |
| NorthDryValley_U | 18 | 15 | 3 | 0 | 6   |
| NorthDryValley_U | 19 | 15 | 3 | 0 | 5   |
| NorthDryValley_U | 9  | 20 | 3 | 1 | 7.5 |
| NorthDryValley_U | 10 | 20 | 3 | 0 | 5   |
| NorthDryValley_U | 11 | 20 | 1 | 0 | 1.5 |
| NorthDryValley_U | 12 | 20 | 2 | 0 | 4   |
| NorthDryValley_U | 13 | 20 | 3 | 0 | 4.5 |
| NorthDryValley_U | 14 | 20 | 3 | 0 | 5.5 |
| NorthDryValley_U | 15 | 20 | 2 | 0 | 3   |
| NorthDryValley_U | 16 | 20 | 3 | 1 | 6   |
| NorthDryValley_U | 17 | 20 | 1 | 0 | 2   |
| NorthDryValley_U | 18 | 20 | 3 | 0 | 6   |
| NorthDryValley_U | 19 | 20 | 3 | 0 | 5   |
| SCWR2B_F         | 22 | 10 | 2 | 1 | 3.5 |
| SCWR2B_F         | 23 | 10 | 2 | 0 | 4   |
| SCWR2B_F         | 25 | 10 | 3 | 0 | 6   |
| SCWR2B_F         | 26 | 10 | 3 | 1 | 6.5 |
| SCWR2B_F         | 27 | 10 | 3 | 1 | 6   |
| SCWR2B_F         | 28 | 10 | 2 | 1 | 3   |
| SCWR2B_F         | 29 | 10 | 3 | 1 | 10  |
| SCWR2B_F         | 30 | 10 | 2 | 0 | 3   |
| SCWR2B_F         | 31 | 10 | 3 | 1 | 5.5 |
| SCWR2B_F         | 36 | 10 | 1 | 0 | 1.5 |
| SCWR2B_F         | 37 | 10 | 2 | 1 | 3   |
| SCWR2B_F         | 38 | 10 | 3 | 0 | 7.5 |
| SCWR2B_F         | 22 | 15 | 2 | 1 | 3.5 |
| SCWR2B_F         | 23 | 15 | 2 | 0 | 4   |
| SCWR2B_F         | 25 | 15 | 3 | 0 | 6   |
| SCWR2B_F         | 26 | 15 | 3 | 1 | 6.5 |
| SCWR2B_F         | 27 | 15 | 3 | 1 | 6   |
| SCWR2B_F         | 28 | 15 | 2 | 0 | 3   |
| SCWR2B_F         | 29 | 15 | 3 | 1 | 10  |
| SCWR2B_F         | 30 | 15 | 2 | 0 | 3   |
| SCWR2B_F         | 31 | 15 | 3 | 0 | 5.5 |

|          |    |    |   |   |     |
|----------|----|----|---|---|-----|
| SCWR2B_F | 36 | 15 | 1 | 0 | 1.5 |
| SCWR2B_F | 37 | 15 | 2 | 0 | 3   |
| SCWR2B_F | 38 | 15 | 3 | 1 | 7.5 |
| SCWR2B_F | 22 | 20 | 2 | 0 | 3.5 |
| SCWR2B_F | 23 | 20 | 2 | 0 | 4   |
| SCWR2B_F | 25 | 20 | 3 | 0 | 6   |
| SCWR2B_F | 26 | 20 | 3 | 1 | 6.5 |
| SCWR2B_F | 27 | 20 | 3 | 1 | 6   |
| SCWR2B_F | 28 | 20 | 2 | 0 | 3   |
| SCWR2B_F | 29 | 20 | 3 | 1 | 10  |
| SCWR2B_F | 30 | 20 | 2 | 0 | 3   |
| SCWR2B_F | 31 | 20 | 3 | 0 | 5.5 |
| SCWR2B_F | 36 | 20 | 1 | 0 | 1.5 |
| SCWR2B_F | 37 | 20 | 2 | 0 | 3   |
| SCWR2B_F | 38 | 20 | 3 | 0 | 7.5 |
| SCWR2B_U | 40 | 10 | 2 | 0 | 3   |
| SCWR2B_U | 41 | 10 | 1 | 0 | 2   |
| SCWR2B_U | 42 | 10 | 1 | 0 | 1   |
| SCWR2B_U | 43 | 10 | 3 | 1 | 5.5 |
| SCWR2B_U | 44 | 10 | 3 | 1 | 4.5 |
| SCWR2B_U | 45 | 10 | 2 | 0 | 4   |
| SCWR2B_U | 46 | 10 | 1 | 0 | 1.5 |
| SCWR2B_U | 47 | 10 | 2 | 0 | 2.5 |
| SCWR2B_U | 49 | 10 | 3 | 0 | 7.5 |
| SCWR2B_U | 50 | 10 | 2 | 0 | 3.5 |
| SCWR2B_U | 51 | 10 | 3 | 1 | 5   |
| SCWR2B_U | 52 | 10 | 3 | 0 | 5   |
| SCWR2B_U | 40 | 15 | 2 | 0 | 3   |
| SCWR2B_U | 41 | 15 | 1 | 0 | 2   |
| SCWR2B_U | 42 | 15 | 1 | 0 | 1   |
| SCWR2B_U | 43 | 15 | 3 | 1 | 5.5 |
| SCWR2B_U | 44 | 15 | 3 | 1 | 4.5 |
| SCWR2B_U | 45 | 15 | 2 | 1 | 4   |
| SCWR2B_U | 46 | 15 | 1 | 0 | 1.5 |
| SCWR2B_U | 47 | 15 | 2 | 0 | 2.5 |
| SCWR2B_U | 49 | 15 | 3 | 0 | 7.5 |
| SCWR2B_U | 50 | 15 | 2 | 0 | 3.5 |
| SCWR2B_U | 51 | 15 | 3 | 0 | 5   |
| SCWR2B_U | 52 | 15 | 3 | 0 | 5   |
| SCWR2B_U | 40 | 20 | 2 | 0 | 3   |
| SCWR2B_U | 41 | 20 | 1 | 0 | 2   |

|           |    |    |   |   |     |
|-----------|----|----|---|---|-----|
| SCWR2B_U  | 42 | 20 | 1 | 0 | 1   |
| SCWR2B_U  | 43 | 20 | 3 | 1 | 5.5 |
| SCWR2B_U  | 44 | 20 | 3 | 1 | 4.5 |
| SCWR2B_U  | 45 | 20 | 2 | 0 | 4   |
| SCWR2B_U  | 46 | 20 | 1 | 0 | 1.5 |
| SCWR2B_U  | 47 | 20 | 2 | 0 | 2.5 |
| SCWR2B_U  | 49 | 20 | 3 | 0 | 7.5 |
| SCWR2B_U  | 50 | 20 | 2 | 0 | 3.5 |
| SCWR2B_U  | 51 | 20 | 3 | 0 | 5   |
| SCWR2B_U  | 52 | 20 | 3 | 0 | 5   |
| SCWR18D_F | 53 | 10 | 1 | 0 | 2   |
| SCWR18D_F | 54 | 10 | 1 | 0 | 1.5 |
| SCWR18D_F | 55 | 10 | 2 | 1 | 3   |
| SCWR18D_F | 56 | 10 | 3 | 0 | 4.5 |
| SCWR18D_F | 57 | 10 | 1 | 0 | 2   |
| SCWR18D_F | 58 | 10 | 3 | 0 | 6   |
| SCWR18D_F | 59 | 10 | 2 | 1 | 2.5 |
| SCWR18D_F | 60 | 10 | 2 | 1 | 2.5 |
| SCWR18D_F | 61 | 10 | 1 | 1 | 2   |
| SCWR18D_F | 62 | 10 | 1 | 0 | 1   |
| SCWR18D_F | 63 | 10 | 1 | 0 | 2   |
| SCWR18D_F | 64 | 10 | 1 | 1 | 1.5 |
| SCWR18D_F | 65 | 10 | 1 | 0 | 1   |
| SCWR18D_F | 66 | 10 | 1 | 1 | 2   |
| SCWR18D_F | 67 | 10 | 1 | 0 | 1   |
| SCWR18D_F | 68 | 10 | 1 | 0 | 2   |
| SCWR18D_F | 69 | 10 | 1 | 0 | 1.5 |
| SCWR18D_F | 70 | 10 | 2 | 0 | 2.5 |
| SCWR18D_F | 71 | 10 | 2 | 0 | 4   |
| SCWR18D_F | 72 | 10 | 1 | 0 | 1   |
| SCWR18D_F | 73 | 10 | 1 | 0 | 1.5 |
| SCWR18D_F | 74 | 10 | 1 | 1 | 2   |
| SCWR18D_F | 75 | 10 | 1 | 0 | 1   |
| SCWR18D_F | 76 | 10 | 1 | 0 | 1   |
| SCWR18D_F | 77 | 10 | 1 | 0 | 1.5 |
| SCWR18D_F | 78 | 10 | 2 | 0 | 3   |
| SCWR18D_F | 79 | 10 | 1 | 0 | 2   |
| SCWR18D_F | 80 | 10 | 1 | 0 | 1   |
| SCWR18D_F | 81 | 10 | 1 | 0 | 2   |
| SCWR18D_F | 82 | 10 | 2 | 0 | 2.5 |
| SCWR18D_F | 83 | 10 | 1 | 0 | 1   |

|           |     |    |   |   |     |
|-----------|-----|----|---|---|-----|
| SCWR18D_F | 84  | 10 | 3 | 0 | 5   |
| SCWR18D_F | 85  | 10 | 2 | 1 | 3.5 |
| SCWR18D_F | 86  | 10 | 3 | 0 | 5   |
| SCWR18D_F | 87  | 10 | 1 | 0 | 1.5 |
| SCWR18D_F | 88  | 10 | 2 | 1 | 3   |
| SCWR18D_F | 89  | 10 | 2 | 1 | 3.5 |
| SCWR18D_F | 90  | 10 | 1 | 1 | 2   |
| SCWR18D_F | 91  | 10 | 2 | 1 | 2.5 |
| SCWR18D_F | 92  | 10 | 1 | 0 | 2   |
| SCWR18D_F | 93  | 10 | 1 | 0 | 1   |
| SCWR18D_F | 94  | 10 | 1 | 0 | 1.5 |
| SCWR18D_F | 95  | 10 | 2 | 1 | 3   |
| SCWR18D_F | 96  | 10 | 2 | 0 | 3   |
| SCWR18D_F | 97  | 10 | 1 | 1 | 0.5 |
| SCWR18D_F | 98  | 10 | 2 | 0 | 3   |
| SCWR18D_F | 99  | 10 | 2 | 1 | 2.5 |
| SCWR18D_F | 100 | 10 | 1 | 0 | 2   |
| SCWR18D_F | 101 | 10 | 2 | 1 | 2.5 |
| SCWR18D_F | 102 | 10 | 2 | 1 | 4   |
| SCWR18D_F | 103 | 10 | 1 | 0 | 2   |
| SCWR18D_F | 53  | 15 | 1 | 0 | 2   |
| SCWR18D_F | 54  | 15 | 1 | 0 | 1.5 |
| SCWR18D_F | 55  | 15 | 2 | 1 | 3   |
| SCWR18D_F | 56  | 15 | 3 | 0 | 4.5 |
| SCWR18D_F | 57  | 15 | 1 | 0 | 2   |
| SCWR18D_F | 58  | 15 | 3 | 0 | 6   |
| SCWR18D_F | 59  | 15 | 2 | 0 | 2.5 |
| SCWR18D_F | 60  | 15 | 2 | 0 | 2.5 |
| SCWR18D_F | 61  | 15 | 1 | 0 | 2   |
| SCWR18D_F | 62  | 15 | 1 | 0 | 1   |
| SCWR18D_F | 63  | 15 | 1 | 0 | 2   |
| SCWR18D_F | 64  | 15 | 1 | 0 | 1.5 |
| SCWR18D_F | 65  | 15 | 1 | 0 | 1   |
| SCWR18D_F | 66  | 15 | 1 | 0 | 2   |
| SCWR18D_F | 67  | 15 | 1 | 0 | 1   |
| SCWR18D_F | 68  | 15 | 1 | 0 | 2   |
| SCWR18D_F | 69  | 15 | 1 | 0 | 1.5 |
| SCWR18D_F | 70  | 15 | 2 | 0 | 2.5 |
| SCWR18D_F | 71  | 15 | 2 | 0 | 4   |
| SCWR18D_F | 72  | 15 | 1 | 0 | 1   |
| SCWR18D_F | 73  | 15 | 1 | 0 | 1.5 |

|           |     |    |   |   |     |
|-----------|-----|----|---|---|-----|
| SCWR18D_F | 74  | 15 | 1 | 0 | 2   |
| SCWR18D_F | 75  | 15 | 1 | 0 | 1   |
| SCWR18D_F | 76  | 15 | 1 | 0 | 1   |
| SCWR18D_F | 77  | 15 | 1 | 0 | 1.5 |
| SCWR18D_F | 78  | 15 | 2 | 0 | 3   |
| SCWR18D_F | 79  | 15 | 1 | 0 | 2   |
| SCWR18D_F | 80  | 15 | 1 | 0 | 1   |
| SCWR18D_F | 81  | 15 | 1 | 0 | 2   |
| SCWR18D_F | 82  | 15 | 2 | 0 | 2.5 |
| SCWR18D_F | 83  | 15 | 1 | 0 | 1   |
| SCWR18D_F | 84  | 15 | 3 | 0 | 5   |
| SCWR18D_F | 85  | 15 | 2 | 0 | 3.5 |
| SCWR18D_F | 86  | 15 | 3 | 0 | 5   |
| SCWR18D_F | 87  | 15 | 1 | 0 | 1.5 |
| SCWR18D_F | 88  | 15 | 2 | 0 | 3   |
| SCWR18D_F | 89  | 15 | 2 | 0 | 3.5 |
| SCWR18D_F | 90  | 15 | 1 | 0 | 2   |
| SCWR18D_F | 91  | 15 | 2 | 0 | 2.5 |
| SCWR18D_F | 92  | 15 | 1 | 0 | 2   |
| SCWR18D_F | 93  | 15 | 1 | 0 | 1   |
| SCWR18D_F | 94  | 15 | 1 | 0 | 1.5 |
| SCWR18D_F | 95  | 15 | 2 | 0 | 3   |
| SCWR18D_F | 96  | 15 | 2 | 0 | 3   |
| SCWR18D_F | 97  | 15 | 1 | 1 | 0.5 |
| SCWR18D_F | 98  | 15 | 2 | 0 | 3   |
| SCWR18D_F | 99  | 15 | 2 | 1 | 2.5 |
| SCWR18D_F | 100 | 15 | 1 | 0 | 2   |
| SCWR18D_F | 101 | 15 | 2 | 0 | 2.5 |
| SCWR18D_F | 102 | 15 | 2 | 0 | 4   |
| SCWR18D_F | 103 | 15 | 1 | 0 | 2   |
| SCWR18D_F | 53  | 20 | 1 | 0 | 2   |
| SCWR18D_F | 54  | 20 | 1 | 0 | 1.5 |
| SCWR18D_F | 55  | 20 | 2 | 1 | 3   |
| SCWR18D_F | 56  | 20 | 3 | 0 | 4.5 |
| SCWR18D_F | 57  | 20 | 1 | 0 | 2   |
| SCWR18D_F | 58  | 20 | 3 | 0 | 6   |
| SCWR18D_F | 59  | 20 | 2 | 0 | 2.5 |
| SCWR18D_F | 60  | 20 | 2 | 0 | 2.5 |
| SCWR18D_F | 61  | 20 | 1 | 0 | 2   |
| SCWR18D_F | 62  | 20 | 1 | 0 | 1   |
| SCWR18D_F | 63  | 20 | 1 | 0 | 2   |

|           |     |    |   |   |     |
|-----------|-----|----|---|---|-----|
| SCWR18D_F | 64  | 20 | 1 | 0 | 1.5 |
| SCWR18D_F | 65  | 20 | 1 | 0 | 1   |
| SCWR18D_F | 66  | 20 | 1 | 0 | 2   |
| SCWR18D_F | 67  | 20 | 1 | 0 | 1   |
| SCWR18D_F | 68  | 20 | 1 | 0 | 2   |
| SCWR18D_F | 69  | 20 | 1 | 0 | 1.5 |
| SCWR18D_F | 70  | 20 | 2 | 0 | 2.5 |
| SCWR18D_F | 71  | 20 | 2 | 0 | 4   |
| SCWR18D_F | 72  | 20 | 1 | 0 | 1   |
| SCWR18D_F | 73  | 20 | 1 | 0 | 1.5 |
| SCWR18D_F | 74  | 20 | 1 | 1 | 2   |
| SCWR18D_F | 75  | 20 | 1 | 0 | 1   |
| SCWR18D_F | 76  | 20 | 1 | 0 | 1   |
| SCWR18D_F | 77  | 20 | 1 | 0 | 1.5 |
| SCWR18D_F | 78  | 20 | 2 | 0 | 3   |
| SCWR18D_F | 79  | 20 | 1 | 0 | 2   |
| SCWR18D_F | 80  | 20 | 1 | 0 | 1   |
| SCWR18D_F | 81  | 20 | 1 | 0 | 2   |
| SCWR18D_F | 82  | 20 | 2 | 0 | 2.5 |
| SCWR18D_F | 83  | 20 | 1 | 0 | 1   |
| SCWR18D_F | 84  | 20 | 3 | 0 | 5   |
| SCWR18D_F | 85  | 20 | 2 | 0 | 3.5 |
| SCWR18D_F | 86  | 20 | 3 | 0 | 5   |
| SCWR18D_F | 87  | 20 | 1 | 0 | 1.5 |
| SCWR18D_F | 88  | 20 | 2 | 0 | 3   |
| SCWR18D_F | 89  | 20 | 2 | 0 | 3.5 |
| SCWR18D_F | 90  | 20 | 1 | 0 | 2   |
| SCWR18D_F | 91  | 20 | 2 | 0 | 2.5 |
| SCWR18D_F | 92  | 20 | 1 | 0 | 2   |
| SCWR18D_F | 93  | 20 | 1 | 0 | 1   |
| SCWR18D_F | 94  | 20 | 1 | 0 | 1.5 |
| SCWR18D_F | 95  | 20 | 2 | 0 | 3   |
| SCWR18D_F | 96  | 20 | 2 | 0 | 3   |
| SCWR18D_F | 97  | 20 | 1 | 0 | 0.5 |
| SCWR18D_F | 98  | 20 | 2 | 0 | 3   |
| SCWR18D_F | 99  | 20 | 2 | 0 | 2.5 |
| SCWR18D_F | 100 | 20 | 1 | 0 | 2   |
| SCWR18D_F | 101 | 20 | 2 | 0 | 2.5 |
| SCWR18D_F | 102 | 20 | 2 | 0 | 4   |
| SCWR18D_F | 103 | 20 | 1 | 0 | 2   |
| SCWR18D_U | 104 | 10 | 2 | 0 | 3.5 |

|           |     |    |   |   |     |
|-----------|-----|----|---|---|-----|
| SCWR18D_U | 105 | 10 | 2 | 1 | 3.5 |
| SCWR18D_U | 106 | 10 | 2 | 1 | 2.5 |
| SCWR18D_U | 107 | 10 | 3 | 0 | 5.5 |
| SCWR18D_U | 108 | 10 | 3 | 1 | 4.5 |
| SCWR18D_U | 109 | 10 | 1 | 1 | 1.5 |
| SCWR18D_U | 110 | 10 | 1 | 0 | 0.5 |
| SCWR18D_U | 111 | 10 | 3 | 1 | 5.5 |
| SCWR18D_U | 112 | 10 | 1 | 0 | 2   |
| SCWR18D_U | 113 | 10 | 2 | 1 | 3   |
| SCWR18D_U | 114 | 10 | 1 | 0 | 1   |
| SCWR18D_U | 115 | 10 | 2 | 1 | 2.5 |
| SCWR18D_U | 116 | 10 | 1 | 1 | 2   |
| SCWR18D_U | 117 | 10 | 1 | 0 | 0.5 |
| SCWR18D_U | 118 | 10 | 1 | 0 | 1   |
| SCWR18D_U | 119 | 10 | 1 | 0 | 1   |
| SCWR18D_U | 120 | 10 | 1 | 0 | 1.5 |
| SCWR18D_U | 121 | 10 | 2 | 0 | 3.5 |
| SCWR18D_U | 122 | 10 | 3 | 1 | 5   |
| SCWR18D_U | 123 | 10 | 1 | 0 | 1.5 |
| SCWR18D_U | 124 | 10 | 3 | 0 | 4.5 |
| SCWR18D_U | 125 | 10 | 3 | 0 | 4.5 |
| SCWR18D_U | 126 | 10 | 2 | 1 | 2.5 |
| SCWR18D_U | 127 | 10 | 1 | 1 | 2   |
| SCWR18D_U | 128 | 10 | 2 | 1 | 3   |
| SCWR18D_U | 129 | 10 | 3 | 1 | 4.5 |
| SCWR18D_U | 130 | 10 | 2 | 1 | 4   |
| SCWR18D_U | 131 | 10 | 1 | 0 | 1   |
| SCWR18D_U | 132 | 10 | 1 | 0 | 1   |
| SCWR18D_U | 134 | 10 | 2 | 1 | 4   |
| SCWR18D_U | 135 | 10 | 1 | 1 | 2   |
| SCWR18D_U | 136 | 10 | 1 | 0 | 1   |
| SCWR18D_U | 137 | 10 | 2 | 0 | 2.5 |
| SCWR18D_U | 138 | 10 | 2 | 1 | 2.5 |
| SCWR18D_U | 139 | 10 | 1 | 0 | 1   |
| SCWR18D_U | 140 | 10 | 1 | 0 | 1.5 |
| SCWR18D_U | 141 | 10 | 1 | 0 | 1.5 |
| SCWR18D_U | 142 | 10 | 1 | 1 | 2   |
| SCWR18D_U | 143 | 10 | 2 | 1 | 3   |
| SCWR18D_U | 144 | 10 | 2 | 0 | 2.5 |
| SCWR18D_U | 145 | 10 | 1 | 0 | 1   |
| SCWR18D_U | 146 | 10 | 1 | 0 | 1   |



|           |     |    |   |   |     |
|-----------|-----|----|---|---|-----|
| SCWR18D_U | 147 | 10 | 1 | 0 | 1   |
| SCWR18D_U | 148 | 10 | 1 | 0 | 1.5 |
| SCWR18D_U | 149 | 10 | 3 | 0 | 4.5 |
| SCWR18D_U | 152 | 10 | 2 | 0 | 2.5 |
| SCWR18D_U | 153 | 10 | 1 | 0 | 0.5 |
| SCWR18D_U | 154 | 10 | 2 | 1 | 3.5 |
| SCWR18D_U | 155 | 10 | 2 | 0 | 3   |
| SCWR18D_U | 156 | 10 | 1 | 1 | 2   |
| SCWR18D_U | 157 | 10 | 2 | 0 | 2.5 |
| SCWR18D_U | 158 | 10 | 1 | 0 | 1   |
| SCWR18D_U | 159 | 10 | 1 | 0 | 1.5 |
| SCWR18D_U | 160 | 10 | 1 | 0 | 1   |
| SCWR18D_U | 161 | 10 | 2 | 0 | 3   |
| SCWR18D_U | 162 | 10 | 1 | 0 | 1.5 |
| SCWR18D_U | 104 | 15 | 2 | 0 | 3.5 |
| SCWR18D_U | 105 | 15 | 2 | 0 | 3.5 |
| SCWR18D_U | 106 | 15 | 2 | 0 | 2.5 |
| SCWR18D_U | 107 | 15 | 3 | 0 | 5.5 |
| SCWR18D_U | 108 | 15 | 3 | 0 | 4.5 |
| SCWR18D_U | 109 | 15 | 1 | 0 | 1.5 |
| SCWR18D_U | 110 | 15 | 1 | 0 | 0.5 |
| SCWR18D_U | 111 | 15 | 3 | 1 | 5.5 |
| SCWR18D_U | 112 | 15 | 1 | 0 | 2   |
| SCWR18D_U | 113 | 15 | 2 | 0 | 3   |
| SCWR18D_U | 114 | 15 | 1 | 0 | 1   |
| SCWR18D_U | 115 | 15 | 2 | 0 | 2.5 |
| SCWR18D_U | 116 | 15 | 1 | 0 | 2   |
| SCWR18D_U | 117 | 15 | 1 | 0 | 0.5 |
| SCWR18D_U | 118 | 15 | 1 | 0 | 1   |
| SCWR18D_U | 119 | 15 | 1 | 0 | 1   |
| SCWR18D_U | 120 | 15 | 1 | 0 | 1.5 |
| SCWR18D_U | 121 | 15 | 2 | 0 | 3.5 |
| SCWR18D_U | 122 | 15 | 3 | 1 | 5   |
| SCWR18D_U | 123 | 15 | 1 | 0 | 1.5 |
| SCWR18D_U | 124 | 15 | 3 | 0 | 4.5 |
| SCWR18D_U | 125 | 15 | 3 | 0 | 4.5 |
| SCWR18D_U | 126 | 15 | 2 | 1 | 2.5 |
| SCWR18D_U | 127 | 15 | 1 | 1 | 2   |
| SCWR18D_U | 128 | 15 | 2 | 0 | 3   |
| SCWR18D_U | 129 | 15 | 3 | 0 | 4.5 |
| SCWR18D_U | 130 | 15 | 2 | 0 | 4   |

|           |     |    |   |   |     |
|-----------|-----|----|---|---|-----|
| SCWR18D_U | 131 | 15 | 1 | 0 | 1   |
| SCWR18D_U | 132 | 15 | 1 | 0 | 1   |
| SCWR18D_U | 134 | 15 | 2 | 1 | 4   |
| SCWR18D_U | 135 | 15 | 1 | 0 | 2   |
| SCWR18D_U | 136 | 15 | 1 | 0 | 1   |
| SCWR18D_U | 137 | 15 | 2 | 0 | 2.5 |
| SCWR18D_U | 138 | 15 | 2 | 0 | 2.5 |
| SCWR18D_U | 139 | 15 | 1 | 0 | 1   |
| SCWR18D_U | 140 | 15 | 1 | 0 | 1.5 |
| SCWR18D_U | 141 | 15 | 1 | 0 | 1.5 |
| SCWR18D_U | 142 | 15 | 1 | 0 | 2   |
| SCWR18D_U | 143 | 15 | 2 | 0 | 3   |
| SCWR18D_U | 144 | 15 | 2 | 0 | 2.5 |
| SCWR18D_U | 145 | 15 | 1 | 0 | 1   |
| SCWR18D_U | 146 | 15 | 1 | 0 | 1   |
| SCWR18D_U | 147 | 15 | 1 | 0 | 1   |
| SCWR18D_U | 148 | 15 | 1 | 1 | 1.5 |
| SCWR18D_U | 149 | 15 | 3 | 0 | 4.5 |
| SCWR18D_U | 152 | 15 | 2 | 1 | 2.5 |
| SCWR18D_U | 153 | 15 | 1 | 0 | 0.5 |
| SCWR18D_U | 154 | 15 | 2 | 1 | 3.5 |
| SCWR18D_U | 155 | 15 | 2 | 0 | 3   |
| SCWR18D_U | 156 | 15 | 1 | 1 | 2   |
| SCWR18D_U | 157 | 15 | 2 | 0 | 2.5 |
| SCWR18D_U | 158 | 15 | 1 | 0 | 1   |
| SCWR18D_U | 159 | 15 | 1 | 0 | 1.5 |
| SCWR18D_U | 160 | 15 | 1 | 0 | 1   |
| SCWR18D_U | 161 | 15 | 2 | 0 | 3   |
| SCWR18D_U | 162 | 15 | 1 | 0 | 1.5 |
| SCWR18D_U | 104 | 20 | 2 | 0 | 3.5 |
| SCWR18D_U | 105 | 20 | 2 | 0 | 3.5 |
| SCWR18D_U | 106 | 20 | 2 | 0 | 2.5 |
| SCWR18D_U | 107 | 20 | 3 | 0 | 5.5 |
| SCWR18D_U | 108 | 20 | 3 | 1 | 4.5 |
| SCWR18D_U | 109 | 20 | 1 | 0 | 1.5 |
| SCWR18D_U | 110 | 20 | 1 | 0 | 0.5 |
| SCWR18D_U | 111 | 20 | 3 | 1 | 5.5 |
| SCWR18D_U | 112 | 20 | 1 | 0 | 2   |
| SCWR18D_U | 113 | 20 | 2 | 0 | 3   |
| SCWR18D_U | 114 | 20 | 1 | 0 | 1   |
| SCWR18D_U | 115 | 20 | 2 | 0 | 2.5 |

|           |     |    |   |   |     |
|-----------|-----|----|---|---|-----|
| SCWR18D_U | 116 | 20 | 1 | 0 | 2   |
| SCWR18D_U | 117 | 20 | 1 | 0 | 0.5 |
| SCWR18D_U | 118 | 20 | 1 | 0 | 1   |
| SCWR18D_U | 119 | 20 | 1 | 0 | 1   |
| SCWR18D_U | 120 | 20 | 1 | 0 | 1.5 |
| SCWR18D_U | 121 | 20 | 2 | 0 | 3.5 |
| SCWR18D_U | 122 | 20 | 3 | 1 | 5   |
| SCWR18D_U | 123 | 20 | 1 | 0 | 1.5 |
| SCWR18D_U | 124 | 20 | 3 | 0 | 4.5 |
| SCWR18D_U | 125 | 20 | 3 | 0 | 4.5 |
| SCWR18D_U | 126 | 20 | 2 | 0 | 2.5 |
| SCWR18D_U | 127 | 20 | 1 | 0 | 2   |
| SCWR18D_U | 128 | 20 | 2 | 0 | 3   |
| SCWR18D_U | 129 | 20 | 3 | 0 | 4.5 |
| SCWR18D_U | 130 | 20 | 2 | 1 | 4   |
| SCWR18D_U | 131 | 20 | 1 | 0 | 1   |
| SCWR18D_U | 132 | 20 | 1 | 0 | 1   |
| SCWR18D_U | 134 | 20 | 2 | 0 | 4   |
| SCWR18D_U | 135 | 20 | 1 | 0 | 2   |
| SCWR18D_U | 136 | 20 | 1 | 0 | 1   |
| SCWR18D_U | 137 | 20 | 2 | 0 | 2.5 |
| SCWR18D_U | 138 | 20 | 2 | 0 | 2.5 |
| SCWR18D_U | 139 | 20 | 1 | 0 | 1   |
| SCWR18D_U | 140 | 20 | 1 | 0 | 1.5 |
| SCWR18D_U | 141 | 20 | 1 | 0 | 1.5 |
| SCWR18D_U | 142 | 20 | 1 | 0 | 2   |
| SCWR18D_U | 143 | 20 | 2 | 0 | 3   |
| SCWR18D_U | 144 | 20 | 2 | 0 | 2.5 |
| SCWR18D_U | 145 | 20 | 1 | 0 | 1   |
| SCWR18D_U | 146 | 20 | 1 | 0 | 1   |
| SCWR18D_U | 147 | 20 | 1 | 0 | 1   |
| SCWR18D_U | 148 | 20 | 1 | 0 | 1.5 |
| SCWR18D_U | 149 | 20 | 3 | 0 | 4.5 |
| SCWR18D_U | 152 | 20 | 2 | 0 | 2.5 |
| SCWR18D_U | 153 | 20 | 1 | 0 | 0.5 |
| SCWR18D_U | 154 | 20 | 2 | 1 | 3.5 |
| SCWR18D_U | 155 | 20 | 2 | 0 | 3   |
| SCWR18D_U | 156 | 20 | 1 | 0 | 2   |
| SCWR18D_U | 157 | 20 | 2 | 0 | 2.5 |
| SCWR18D_U | 158 | 20 | 1 | 0 | 1   |
| SCWR18D_U | 159 | 20 | 1 | 0 | 1.5 |

|           |     |    |   |   |     |
|-----------|-----|----|---|---|-----|
| SCWR18D_U | 160 | 20 | 1 | 0 | 1   |
| SCWR18D_U | 161 | 20 | 2 | 0 | 3   |
| SCWR18D_U | 162 | 20 | 1 | 0 | 1.5 |
| SCWR24_F  | 163 | 10 | 3 | 1 | 6   |
| SCWR24_F  | 164 | 10 | 3 | 1 | 6   |
| SCWR24_F  | 165 | 10 | 1 | 0 | 1   |
| SCWR24_F  | 166 | 10 | 1 | 0 | 2   |
| SCWR24_F  | 167 | 10 | 1 | 0 | 0.5 |
| SCWR24_F  | 168 | 10 | 1 | 0 | 1   |
| SCWR24_F  | 169 | 10 | 1 | 0 | 1.5 |
| SCWR24_F  | 170 | 10 | 2 | 0 | 4   |
| SCWR24_F  | 171 | 10 | 2 | 0 | 2   |
| SCWR24_F  | 172 | 10 | 3 | 0 | 5   |
| SCWR24_F  | 173 | 10 | 2 | 0 | 2.5 |
| SCWR24_F  | 174 | 10 | 3 | 0 | 4.5 |
| SCWR24_F  | 175 | 10 | 2 | 0 | 3   |
| SCWR24_F  | 176 | 10 | 3 | 1 | 5.5 |
| SCWR24_F  | 177 | 10 | 3 | 0 | 5   |
| SCWR24_F  | 178 | 10 | 3 | 1 | 5.5 |
| SCWR24_F  | 179 | 10 | 1 | 0 | 1.5 |
| SCWR24_F  | 180 | 10 | 2 | 0 | 3   |
| SCWR24_F  | 181 | 10 | 3 | 1 | 4.5 |
| SCWR24_F  | 182 | 10 | 1 | 0 | 2   |
| SCWR24_F  | 183 | 10 | 1 | 0 | 1.5 |
| SCWR24_F  | 184 | 10 | 3 | 0 | 4.5 |
| SCWR24_F  | 185 | 10 | 3 | 1 | 10  |
| SCWR24_F  | 186 | 10 | 2 | 0 | 3   |
| SCWR24_F  | 187 | 10 | 2 | 0 | 3   |
| SCWR24_F  | 188 | 10 | 2 | 0 | 3   |
| SCWR24_F  | 189 | 10 | 2 | 0 | 3   |
| SCWR24_F  | 190 | 10 | 1 | 1 | 2   |
| SCWR24_F  | 191 | 10 | 1 | 0 | 2   |
| SCWR24_F  | 192 | 10 | 1 | 0 | 1   |
| SCWR24_F  | 193 | 10 | 1 | 0 | 1.5 |
| SCWR24_F  | 194 | 10 | 2 | 0 | 3.5 |
| SCWR24_F  | 195 | 10 | 1 | 0 | 2   |
| SCWR24_F  | 196 | 10 | 2 | 0 | 4   |
| SCWR24_F  | 197 | 10 | 3 | 0 | 5.5 |
| SCWR24_F  | 198 | 10 | 1 | 0 | 1   |
| SCWR24_F  | 199 | 10 | 3 | 1 | 5.5 |
| SCWR24_F  | 200 | 10 | 3 | 0 | 4.5 |

|          |     |    |   |   |      |
|----------|-----|----|---|---|------|
| SCWR24_F | 201 | 10 | 3 | 1 | 4.5  |
| SCWR24_F | 202 | 10 | 3 | 1 | 6    |
| SCWR24_F | 203 | 10 | 3 | 1 | 7    |
| SCWR24_F | 204 | 10 | 2 | 0 | 3.5  |
| SCWR24_F | 205 | 10 | 1 | 0 | 1.5  |
| SCWR24_F | 206 | 10 | 3 | 0 | 8.5  |
| SCWR24_F | 207 | 10 | 3 | 0 | 4.5  |
| SCWR24_F | 208 | 10 | 2 | 0 | 2.5  |
| SCWR24_F | 209 | 10 | 3 | 1 | 5    |
| SCWR24_F | 210 | 10 | 3 | 1 | 8.5  |
| SCWR24_F | 211 | 10 | 1 | 0 | 1.5  |
| SCWR24_F | 212 | 10 | 1 | 0 | 1    |
| SCWR24_F | 213 | 10 | 1 | 0 | 1    |
| SCWR24_F | 214 | 10 | 1 | 0 | 0.5  |
| SCWR24_F | 215 | 10 | 2 | 0 | 3    |
| SCWR24_F | 216 | 10 | 2 | 0 | 3    |
| SCWR24_F | 217 | 10 | 3 | 1 | 5    |
| SCWR24_F | 218 | 10 | 3 | 1 | 4.5  |
| SCWR24_F | 219 | 10 | 1 | 0 | 1    |
| SCWR24_F | 220 | 10 | 1 | 0 | 1    |
| SCWR24_F | 221 | 10 | 1 | 0 | 1    |
| SCWR24_F | 222 | 10 | 1 | 0 | 1    |
| SCWR24_F | 223 | 10 | 3 | 0 | 10.5 |
| SCWR24_F | 224 | 10 | 2 | 0 | 3    |
| SCWR24_F | 225 | 10 | 3 | 0 | 4.5  |
| SCWR24_F | 226 | 10 | 1 | 0 | 2    |
| SCWR24_F | 227 | 10 | 2 | 0 | 3    |
| SCWR24_F | 228 | 10 | 1 | 0 | 2    |
| SCWR24_F | 229 | 10 | 3 | 0 | 5    |
| SCWR24_F | 230 | 10 | 3 | 0 | 6    |
| SCWR24_F | 231 | 10 | 3 | 0 | 4.5  |
| SCWR24_F | 232 | 10 | 1 | 0 | 1.5  |
| SCWR24_F | 233 | 10 | 3 | 1 | 6    |
| SCWR24_F | 234 | 10 | 3 | 1 | 6    |
| SCWR24_F | 235 | 10 | 3 | 1 | 8    |
| SCWR24_F | 236 | 10 | 2 | 0 | 3.5  |
| SCWR24_F | 237 | 10 | 1 | 0 | 0.5  |
| SCWR24_F | 238 | 10 | 2 | 0 | 3    |
| SCWR24_F | 239 | 10 | 2 | 0 | 3.5  |
| SCWR24_F | 240 | 10 | 3 | 0 | 5    |
| SCWR24_F | 241 | 10 | 1 | 0 | 1    |

|          |     |    |   |   |     |
|----------|-----|----|---|---|-----|
| SCWR24_F | 242 | 10 | 3 | 0 | 5   |
| SCWR24_F | 243 | 10 | 3 | 0 | 4.5 |
| SCWR24_F | 244 | 10 | 3 | 0 | 4.5 |
| SCWR24_F | 245 | 10 | 1 | 1 | 2   |
| SCWR24_F | 246 | 10 | 3 | 1 | 9.5 |
| SCWR24_F | 247 | 10 | 3 | 1 | 8   |
| SCWR24_F | 248 | 10 | 2 | 0 | 3.5 |
| SCWR24_F | 249 | 10 | 2 | 0 | 3.5 |
| SCWR24_F | 250 | 10 | 2 | 0 | 3   |
| SCWR24_F | 251 | 10 | 2 | 0 | 3   |
| SCWR24_F | 252 | 10 | 2 | 0 | 3   |
| SCWR24_F | 253 | 10 | 2 | 1 | 4   |
| SCWR24_F | 254 | 10 | 2 | 0 | 3.5 |
| SCWR24_F | 255 | 10 | 1 | 0 | 1   |
| SCWR24_F | 256 | 10 | 1 | 0 | 2   |
| SCWR24_F | 257 | 10 | 1 | 0 | 1   |
| SCWR24_F | 163 | 15 | 3 | 0 | 6   |
| SCWR24_F | 164 | 15 | 3 | 0 | 6   |
| SCWR24_F | 165 | 15 | 1 | 0 | 1   |
| SCWR24_F | 166 | 15 | 1 | 0 | 2   |
| SCWR24_F | 167 | 15 | 1 | 0 | 0.5 |
| SCWR24_F | 168 | 15 | 1 | 0 | 1   |
| SCWR24_F | 169 | 15 | 1 | 0 | 1.5 |
| SCWR24_F | 170 | 15 | 2 | 0 | 4   |
| SCWR24_F | 171 | 15 | 2 | 0 | 2   |
| SCWR24_F | 172 | 15 | 3 | 0 | 5   |
| SCWR24_F | 173 | 15 | 2 | 0 | 2.5 |
| SCWR24_F | 174 | 15 | 3 | 0 | 4.5 |
| SCWR24_F | 175 | 15 | 2 | 0 | 3   |
| SCWR24_F | 176 | 15 | 3 | 0 | 5.5 |
| SCWR24_F | 177 | 15 | 3 | 0 | 5   |
| SCWR24_F | 178 | 15 | 3 | 1 | 5.5 |
| SCWR24_F | 179 | 15 | 1 | 0 | 1.5 |
| SCWR24_F | 180 | 15 | 2 | 0 | 3   |
| SCWR24_F | 181 | 15 | 3 | 0 | 4.5 |
| SCWR24_F | 182 | 15 | 1 | 0 | 2   |
| SCWR24_F | 183 | 15 | 1 | 0 | 1.5 |
| SCWR24_F | 184 | 15 | 3 | 0 | 4.5 |
| SCWR24_F | 185 | 15 | 3 | 1 | 10  |
| SCWR24_F | 186 | 15 | 2 | 0 | 3   |
| SCWR24_F | 187 | 15 | 2 | 0 | 3   |

|          |     |    |   |   |      |
|----------|-----|----|---|---|------|
| SCWR24_F | 188 | 15 | 2 | 0 | 3    |
| SCWR24_F | 189 | 15 | 2 | 0 | 3    |
| SCWR24_F | 190 | 15 | 1 | 1 | 2    |
| SCWR24_F | 191 | 15 | 1 | 0 | 2    |
| SCWR24_F | 192 | 15 | 1 | 0 | 1    |
| SCWR24_F | 193 | 15 | 1 | 0 | 1.5  |
| SCWR24_F | 194 | 15 | 2 | 0 | 3.5  |
| SCWR24_F | 195 | 15 | 1 | 0 | 2    |
| SCWR24_F | 196 | 15 | 2 | 0 | 4    |
| SCWR24_F | 197 | 15 | 3 | 0 | 5.5  |
| SCWR24_F | 198 | 15 | 1 | 0 | 1    |
| SCWR24_F | 199 | 15 | 3 | 0 | 5.5  |
| SCWR24_F | 200 | 15 | 3 | 0 | 4.5  |
| SCWR24_F | 201 | 15 | 3 | 0 | 4.5  |
| SCWR24_F | 202 | 15 | 3 | 1 | 6    |
| SCWR24_F | 203 | 15 | 3 | 1 | 7    |
| SCWR24_F | 204 | 15 | 2 | 0 | 3.5  |
| SCWR24_F | 205 | 15 | 1 | 0 | 1.5  |
| SCWR24_F | 206 | 15 | 3 | 0 | 8.5  |
| SCWR24_F | 207 | 15 | 3 | 0 | 4.5  |
| SCWR24_F | 208 | 15 | 2 | 0 | 2.5  |
| SCWR24_F | 209 | 15 | 3 | 1 | 5    |
| SCWR24_F | 210 | 15 | 3 | 1 | 8.5  |
| SCWR24_F | 211 | 15 | 1 | 0 | 1.5  |
| SCWR24_F | 212 | 15 | 1 | 0 | 1    |
| SCWR24_F | 213 | 15 | 1 | 0 | 1    |
| SCWR24_F | 214 | 15 | 1 | 0 | 0.5  |
| SCWR24_F | 215 | 15 | 2 | 0 | 3    |
| SCWR24_F | 216 | 15 | 2 | 0 | 3    |
| SCWR24_F | 217 | 15 | 3 | 0 | 5    |
| SCWR24_F | 218 | 15 | 3 | 0 | 4.5  |
| SCWR24_F | 219 | 15 | 1 | 0 | 1    |
| SCWR24_F | 220 | 15 | 1 | 0 | 1    |
| SCWR24_F | 221 | 15 | 1 | 0 | 1    |
| SCWR24_F | 222 | 15 | 1 | 0 | 1    |
| SCWR24_F | 223 | 15 | 3 | 0 | 10.5 |
| SCWR24_F | 224 | 15 | 2 | 0 | 3    |
| SCWR24_F | 225 | 15 | 3 | 0 | 4.5  |
| SCWR24_F | 226 | 15 | 1 | 0 | 2    |
| SCWR24_F | 227 | 15 | 2 | 0 | 3    |
| SCWR24_F | 228 | 15 | 1 | 0 | 2    |

|          |     |    |   |   |     |
|----------|-----|----|---|---|-----|
| SCWR24_F | 229 | 15 | 3 | 0 | 5   |
| SCWR24_F | 230 | 15 | 3 | 0 | 6   |
| SCWR24_F | 231 | 15 | 3 | 0 | 4.5 |
| SCWR24_F | 232 | 15 | 1 | 0 | 1.5 |
| SCWR24_F | 233 | 15 | 3 | 1 | 6   |
| SCWR24_F | 234 | 15 | 3 | 0 | 6   |
| SCWR24_F | 235 | 15 | 3 | 1 | 8   |
| SCWR24_F | 236 | 15 | 2 | 0 | 3.5 |
| SCWR24_F | 237 | 15 | 1 | 0 | 0.5 |
| SCWR24_F | 238 | 15 | 2 | 0 | 3   |
| SCWR24_F | 239 | 15 | 2 | 0 | 3.5 |
| SCWR24_F | 240 | 15 | 3 | 0 | 5   |
| SCWR24_F | 241 | 15 | 1 | 0 | 1   |
| SCWR24_F | 242 | 15 | 3 | 0 | 5   |
| SCWR24_F | 243 | 15 | 3 | 0 | 4.5 |
| SCWR24_F | 244 | 15 | 3 | 0 | 4.5 |
| SCWR24_F | 245 | 15 | 1 | 0 | 2   |
| SCWR24_F | 246 | 15 | 3 | 1 | 9.5 |
| SCWR24_F | 247 | 15 | 3 | 1 | 8   |
| SCWR24_F | 248 | 15 | 2 | 0 | 3.5 |
| SCWR24_F | 249 | 15 | 2 | 0 | 3.5 |
| SCWR24_F | 250 | 15 | 2 | 0 | 3   |
| SCWR24_F | 251 | 15 | 2 | 0 | 3   |
| SCWR24_F | 252 | 15 | 2 | 0 | 3   |
| SCWR24_F | 253 | 15 | 2 | 0 | 4   |
| SCWR24_F | 254 | 15 | 2 | 0 | 3.5 |
| SCWR24_F | 255 | 15 | 1 | 0 | 1   |
| SCWR24_F | 256 | 15 | 1 | 0 | 2   |
| SCWR24_F | 257 | 15 | 1 | 0 | 1   |
| SCWR24_F | 163 | 20 | 3 | 1 | 6   |
| SCWR24_F | 164 | 20 | 3 | 0 | 6   |
| SCWR24_F | 165 | 20 | 1 | 0 | 1   |
| SCWR24_F | 166 | 20 | 1 | 0 | 2   |
| SCWR24_F | 167 | 20 | 1 | 0 | 0.5 |
| SCWR24_F | 168 | 20 | 1 | 0 | 1   |
| SCWR24_F | 169 | 20 | 1 | 0 | 1.5 |
| SCWR24_F | 170 | 20 | 2 | 0 | 4   |
| SCWR24_F | 171 | 20 | 2 | 0 | 2   |
| SCWR24_F | 172 | 20 | 3 | 0 | 5   |
| SCWR24_F | 173 | 20 | 2 | 0 | 2.5 |
| SCWR24_F | 174 | 20 | 3 | 0 | 4.5 |



|          |     |    |   |   |     |
|----------|-----|----|---|---|-----|
| SCWR24_F | 175 | 20 | 2 | 0 | 3   |
| SCWR24_F | 176 | 20 | 3 | 0 | 5.5 |
| SCWR24_F | 177 | 20 | 3 | 0 | 5   |
| SCWR24_F | 178 | 20 | 3 | 0 | 5.5 |
| SCWR24_F | 179 | 20 | 1 | 0 | 1.5 |
| SCWR24_F | 180 | 20 | 2 | 0 | 3   |
| SCWR24_F | 181 | 20 | 3 | 0 | 4.5 |
| SCWR24_F | 182 | 20 | 1 | 0 | 2   |
| SCWR24_F | 183 | 20 | 1 | 0 | 1.5 |
| SCWR24_F | 184 | 20 | 3 | 0 | 4.5 |
| SCWR24_F | 185 | 20 | 3 | 1 | 10  |
| SCWR24_F | 186 | 20 | 2 | 0 | 3   |
| SCWR24_F | 187 | 20 | 2 | 0 | 3   |
| SCWR24_F | 188 | 20 | 2 | 0 | 3   |
| SCWR24_F | 189 | 20 | 2 | 0 | 3   |
| SCWR24_F | 190 | 20 | 1 | 0 | 2   |
| SCWR24_F | 191 | 20 | 1 | 0 | 2   |
| SCWR24_F | 192 | 20 | 1 | 0 | 1   |
| SCWR24_F | 193 | 20 | 1 | 0 | 1.5 |
| SCWR24_F | 194 | 20 | 2 | 0 | 3.5 |
| SCWR24_F | 195 | 20 | 1 | 0 | 2   |
| SCWR24_F | 196 | 20 | 2 | 0 | 4   |
| SCWR24_F | 197 | 20 | 3 | 0 | 5.5 |
| SCWR24_F | 198 | 20 | 1 | 0 | 1   |
| SCWR24_F | 199 | 20 | 3 | 0 | 5.5 |
| SCWR24_F | 200 | 20 | 3 | 0 | 4.5 |
| SCWR24_F | 201 | 20 | 3 | 0 | 4.5 |
| SCWR24_F | 202 | 20 | 3 | 0 | 6   |
| SCWR24_F | 203 | 20 | 3 | 0 | 7   |
| SCWR24_F | 204 | 20 | 2 | 0 | 3.5 |
| SCWR24_F | 205 | 20 | 1 | 0 | 1.5 |
| SCWR24_F | 206 | 20 | 3 | 0 | 8.5 |
| SCWR24_F | 207 | 20 | 3 | 0 | 4.5 |
| SCWR24_F | 208 | 20 | 2 | 0 | 2.5 |
| SCWR24_F | 209 | 20 | 3 | 0 | 5   |
| SCWR24_F | 210 | 20 | 3 | 1 | 8.5 |
| SCWR24_F | 211 | 20 | 1 | 0 | 1.5 |
| SCWR24_F | 212 | 20 | 1 | 0 | 1   |
| SCWR24_F | 213 | 20 | 1 | 0 | 1   |
| SCWR24_F | 214 | 20 | 1 | 0 | 0.5 |
| SCWR24_F | 215 | 20 | 2 | 0 | 3   |

|          |     |    |   |   |      |
|----------|-----|----|---|---|------|
| SCWR24_F | 216 | 20 | 2 | 0 | 3    |
| SCWR24_F | 217 | 20 | 3 | 0 | 5    |
| SCWR24_F | 218 | 20 | 3 | 0 | 4.5  |
| SCWR24_F | 219 | 20 | 1 | 0 | 1    |
| SCWR24_F | 220 | 20 | 1 | 0 | 1    |
| SCWR24_F | 221 | 20 | 1 | 0 | 1    |
| SCWR24_F | 222 | 20 | 1 | 0 | 1    |
| SCWR24_F | 223 | 20 | 3 | 0 | 10.5 |
| SCWR24_F | 224 | 20 | 2 | 0 | 3    |
| SCWR24_F | 225 | 20 | 3 | 0 | 4.5  |
| SCWR24_F | 226 | 20 | 1 | 0 | 2    |
| SCWR24_F | 227 | 20 | 2 | 0 | 3    |
| SCWR24_F | 228 | 20 | 1 | 0 | 2    |
| SCWR24_F | 229 | 20 | 3 | 0 | 5    |
| SCWR24_F | 230 | 20 | 3 | 0 | 6    |
| SCWR24_F | 231 | 20 | 3 | 0 | 4.5  |
| SCWR24_F | 232 | 20 | 1 | 0 | 1.5  |
| SCWR24_F | 233 | 20 | 3 | 0 | 6    |
| SCWR24_F | 234 | 20 | 3 | 0 | 6    |
| SCWR24_F | 235 | 20 | 3 | 1 | 8    |
| SCWR24_F | 236 | 20 | 2 | 0 | 3.5  |
| SCWR24_F | 237 | 20 | 1 | 0 | 0.5  |
| SCWR24_F | 238 | 20 | 2 | 0 | 3    |
| SCWR24_F | 239 | 20 | 2 | 0 | 3.5  |
| SCWR24_F | 240 | 20 | 3 | 0 | 5    |
| SCWR24_F | 241 | 20 | 1 | 0 | 1    |
| SCWR24_F | 242 | 20 | 3 | 0 | 5    |
| SCWR24_F | 243 | 20 | 3 | 0 | 4.5  |
| SCWR24_F | 244 | 20 | 3 | 0 | 4.5  |
| SCWR24_F | 245 | 20 | 1 | 0 | 2    |
| SCWR24_F | 246 | 20 | 3 | 1 | 9.5  |
| SCWR24_F | 247 | 20 | 3 | 1 | 8    |
| SCWR24_F | 248 | 20 | 2 | 0 | 3.5  |
| SCWR24_F | 249 | 20 | 2 | 0 | 3.5  |
| SCWR24_F | 250 | 20 | 2 | 0 | 3    |
| SCWR24_F | 251 | 20 | 2 | 0 | 3    |
| SCWR24_F | 252 | 20 | 2 | 0 | 3    |
| SCWR24_F | 253 | 20 | 2 | 0 | 4    |
| SCWR24_F | 254 | 20 | 2 | 0 | 3.5  |
| SCWR24_F | 255 | 20 | 1 | 0 | 1    |
| SCWR24_F | 256 | 20 | 1 | 0 | 2    |

|          |     |    |   |   |      |
|----------|-----|----|---|---|------|
| SCWR24_F | 257 | 20 | 1 | 0 | 1    |
| SCWR24_U | 260 | 10 | 2 | 0 | 2.5  |
| SCWR24_U | 261 | 10 | 3 | 1 | 10.5 |
| SCWR24_U | 262 | 10 | 3 | 1 | 7    |
| SCWR24_U | 263 | 10 | 1 | 0 | 1    |
| SCWR24_U | 264 | 10 | 1 | 0 | 1    |
| SCWR24_U | 265 | 10 | 1 | 0 | 1.5  |
| SCWR24_U | 266 | 10 | 2 | 0 | 2.5  |
| SCWR24_U | 267 | 10 | 3 | 1 | 9    |
| SCWR24_U | 268 | 10 | 3 | 0 | 5    |
| SCWR24_U | 269 | 10 | 1 | 0 | 1    |
| SCWR24_U | 270 | 10 | 3 | 0 | 6    |
| SCWR24_U | 271 | 10 | 3 | 1 | 5    |
| SCWR24_U | 272 | 10 | 3 | 1 | 5.5  |
| SCWR24_U | 273 | 10 | 3 | 1 | 4.5  |
| SCWR24_U | 274 | 10 | 3 | 1 | 5    |
| SCWR24_U | 275 | 10 | 3 | 1 | 5.5  |
| SCWR24_U | 276 | 10 | 3 | 1 | 9    |
| SCWR24_U | 277 | 10 | 2 | 1 | 3    |
| SCWR24_U | 278 | 10 | 3 | 1 | 6    |
| SCWR24_U | 279 | 10 | 3 | 1 | 4.5  |
| SCWR24_U | 280 | 10 | 1 | 0 | 1    |
| SCWR24_U | 281 | 10 | 1 | 0 | 2    |
| SCWR24_U | 282 | 10 | 3 | 1 | 7    |
| SCWR24_U | 283 | 10 | 2 | 0 | 2.5  |
| SCWR24_U | 284 | 10 | 3 | 1 | 8    |
| SCWR24_U | 285 | 10 | 3 | 1 | 5    |
| SCWR24_U | 286 | 10 | 1 | 0 | 0.5  |
| SCWR24_U | 287 | 10 | 1 | 0 | 1    |
| SCWR24_U | 288 | 10 | 3 | 1 | 5.5  |
| SCWR24_U | 289 | 10 | 3 | 1 | 8    |
| SCWR24_U | 290 | 10 | 3 | 1 | 6    |
| SCWR24_U | 291 | 10 | 1 | 0 | 2    |
| SCWR24_U | 292 | 10 | 3 | 1 | 6    |
| SCWR24_U | 293 | 10 | 3 | 1 | 4.5  |
| SCWR24_U | 294 | 10 | 3 | 1 | 5    |
| SCWR24_U | 295 | 10 | 1 | 0 | 0.5  |
| SCWR24_U | 296 | 10 | 3 | 1 | 5    |
| SCWR24_U | 297 | 10 | 1 | 0 | 1    |
| SCWR24_U | 298 | 10 | 1 | 0 | 2    |
| SCWR24_U | 299 | 10 | 1 | 0 | 1    |

|          |     |    |   |   |     |
|----------|-----|----|---|---|-----|
| SCWR24_U | 300 | 10 | 3 | 0 | 6.5 |
| SCWR24_U | 304 | 10 | 3 | 1 | 5   |
| SCWR24_U | 305 | 10 | 1 | 0 | 0.5 |
| SCWR24_U | 306 | 10 | 3 | 1 | 7.5 |
| SCWR24_U | 307 | 10 | 2 | 1 | 4   |
| SCWR24_U | 308 | 10 | 1 | 0 | 1.5 |
| SCWR24_U | 309 | 10 | 3 | 1 | 5   |
| SCWR24_U | 310 | 10 | 3 | 0 | 4.5 |
| SCWR24_U | 311 | 10 | 2 | 0 | 3.5 |
| SCWR24_U | 312 | 10 | 1 | 0 | 2   |
| SCWR24_U | 313 | 10 | 3 | 1 | 8.5 |
| SCWR24_U | 314 | 10 | 1 | 0 | 1   |
| SCWR24_U | 315 | 10 | 3 | 1 | 6   |
| SCWR24_U | 316 | 10 | 3 | 1 | 9.5 |
| SCWR24_U | 317 | 10 | 1 | 0 | 1   |
| SCWR24_U | 318 | 10 | 1 | 0 | 1   |
| SCWR24_U | 319 | 10 | 1 | 0 | 1.5 |
| SCWR24_U | 320 | 10 | 3 | 1 | 7.5 |
| SCWR24_U | 321 | 10 | 3 | 1 | 4.5 |
| SCWR24_U | 322 | 10 | 1 | 0 | 1.5 |
| SCWR24_U | 323 | 10 | 3 | 1 | 6   |
| SCWR24_U | 324 | 10 | 3 | 1 | 5.5 |
| SCWR24_U | 325 | 10 | 2 | 0 | 3   |
| SCWR24_U | 326 | 10 | 1 | 0 | 1.5 |
| SCWR24_U | 327 | 10 | 3 | 1 | 4.5 |
| SCWR24_U | 328 | 10 | 3 | 1 | 5.5 |
| SCWR24_U | 329 | 10 | 2 | 0 | 2.5 |
| SCWR24_U | 330 | 10 | 3 | 0 | 7.5 |
| SCWR24_U | 331 | 10 | 1 | 0 | 0.5 |
| SCWR24_U | 332 | 10 | 3 | 1 | 6.5 |
| SCWR24_U | 333 | 10 | 3 | 0 | 7.5 |
| SCWR24_U | 334 | 10 | 2 | 1 | 3   |
| SCWR24_U | 335 | 10 | 2 | 0 | 3.5 |
| SCWR24_U | 336 | 10 | 1 | 0 | 1.5 |
| SCWR24_U | 337 | 10 | 3 | 1 | 6.5 |
| SCWR24_U | 338 | 10 | 3 | 1 | 7   |
| SCWR24_U | 339 | 10 | 1 | 0 | 1.5 |
| SCWR24_U | 340 | 10 | 2 | 1 | 3.5 |
| SCWR24_U | 341 | 10 | 3 | 1 | 5   |
| SCWR24_U | 342 | 10 | 1 | 0 | 1.5 |
| SCWR24_U | 343 | 10 | 1 | 0 | 1   |

|          |     |    |   |   |      |
|----------|-----|----|---|---|------|
| SCWR24_U | 344 | 10 | 1 | 0 | 1    |
| SCWR24_U | 345 | 10 | 1 | 0 | 2    |
| SCWR24_U | 346 | 10 | 2 | 0 | 3    |
| SCWR24_U | 347 | 10 | 1 | 0 | 1    |
| SCWR24_U | 348 | 10 | 2 | 1 | 4    |
| SCWR24_U | 349 | 10 | 1 | 0 | 1    |
| SCWR24_U | 350 | 10 | 2 | 1 | 3    |
| SCWR24_U | 260 | 15 | 2 | 0 | 2.5  |
| SCWR24_U | 261 | 15 | 3 | 1 | 10.5 |
| SCWR24_U | 262 | 15 | 3 | 1 | 7    |
| SCWR24_U | 263 | 15 | 1 | 0 | 1    |
| SCWR24_U | 264 | 15 | 1 | 0 | 1    |
| SCWR24_U | 265 | 15 | 1 | 0 | 1.5  |
| SCWR24_U | 266 | 15 | 2 | 0 | 2.5  |
| SCWR24_U | 267 | 15 | 3 | 1 | 9    |
| SCWR24_U | 268 | 15 | 3 | 0 | 5    |
| SCWR24_U | 269 | 15 | 1 | 0 | 1    |
| SCWR24_U | 270 | 15 | 3 | 0 | 6    |
| SCWR24_U | 271 | 15 | 3 | 0 | 5    |
| SCWR24_U | 272 | 15 | 3 | 1 | 5.5  |
| SCWR24_U | 273 | 15 | 3 | 0 | 4.5  |
| SCWR24_U | 274 | 15 | 3 | 1 | 5    |
| SCWR24_U | 275 | 15 | 3 | 0 | 5.5  |
| SCWR24_U | 276 | 15 | 3 | 0 | 9    |
| SCWR24_U | 277 | 15 | 2 | 0 | 3    |
| SCWR24_U | 278 | 15 | 3 | 0 | 6    |
| SCWR24_U | 279 | 15 | 3 | 0 | 4.5  |
| SCWR24_U | 280 | 15 | 1 | 0 | 1    |
| SCWR24_U | 281 | 15 | 1 | 0 | 2    |
| SCWR24_U | 282 | 15 | 3 | 0 | 7    |
| SCWR24_U | 283 | 15 | 2 | 0 | 2.5  |
| SCWR24_U | 284 | 15 | 3 | 1 | 8    |
| SCWR24_U | 285 | 15 | 3 | 1 | 5    |
| SCWR24_U | 286 | 15 | 1 | 0 | 0.5  |
| SCWR24_U | 287 | 15 | 1 | 0 | 1    |
| SCWR24_U | 288 | 15 | 3 | 0 | 5.5  |
| SCWR24_U | 289 | 15 | 3 | 1 | 8    |
| SCWR24_U | 290 | 15 | 3 | 1 | 6    |
| SCWR24_U | 291 | 15 | 1 | 0 | 2    |
| SCWR24_U | 292 | 15 | 3 | 1 | 6    |
| SCWR24_U | 293 | 15 | 3 | 1 | 4.5  |

|          |     |    |   |   |     |
|----------|-----|----|---|---|-----|
| SCWR24_U | 294 | 15 | 3 | 0 | 5   |
| SCWR24_U | 295 | 15 | 1 | 0 | 0.5 |
| SCWR24_U | 296 | 15 | 3 | 1 | 5   |
| SCWR24_U | 297 | 15 | 1 | 0 | 1   |
| SCWR24_U | 298 | 15 | 1 | 0 | 2   |
| SCWR24_U | 299 | 15 | 1 | 0 | 1   |
| SCWR24_U | 300 | 15 | 3 | 0 | 6.5 |
| SCWR24_U | 304 | 15 | 3 | 0 | 5   |
| SCWR24_U | 305 | 15 | 1 | 0 | 0.5 |
| SCWR24_U | 306 | 15 | 3 | 0 | 7.5 |
| SCWR24_U | 307 | 15 | 2 | 0 | 4   |
| SCWR24_U | 308 | 15 | 1 | 0 | 1.5 |
| SCWR24_U | 309 | 15 | 3 | 0 | 5   |
| SCWR24_U | 310 | 15 | 3 | 0 | 4.5 |
| SCWR24_U | 311 | 15 | 2 | 0 | 3.5 |
| SCWR24_U | 312 | 15 | 1 | 0 | 2   |
| SCWR24_U | 313 | 15 | 3 | 0 | 8.5 |
| SCWR24_U | 314 | 15 | 1 | 0 | 1   |
| SCWR24_U | 315 | 15 | 3 | 1 | 6   |
| SCWR24_U | 316 | 15 | 3 | 1 | 9.5 |
| SCWR24_U | 317 | 15 | 1 | 0 | 1   |
| SCWR24_U | 318 | 15 | 1 | 0 | 1   |
| SCWR24_U | 319 | 15 | 1 | 0 | 1.5 |
| SCWR24_U | 320 | 15 | 3 | 0 | 7.5 |
| SCWR24_U | 321 | 15 | 3 | 0 | 4.5 |
| SCWR24_U | 322 | 15 | 1 | 0 | 1.5 |
| SCWR24_U | 323 | 15 | 3 | 0 | 6   |
| SCWR24_U | 324 | 15 | 3 | 1 | 5.5 |
| SCWR24_U | 325 | 15 | 2 | 0 | 3   |
| SCWR24_U | 326 | 15 | 1 | 0 | 1.5 |
| SCWR24_U | 327 | 15 | 3 | 0 | 4.5 |
| SCWR24_U | 328 | 15 | 3 | 1 | 5.5 |
| SCWR24_U | 329 | 15 | 2 | 0 | 2.5 |
| SCWR24_U | 330 | 15 | 3 | 0 | 7.5 |
| SCWR24_U | 331 | 15 | 1 | 0 | 0.5 |
| SCWR24_U | 332 | 15 | 3 | 1 | 6.5 |
| SCWR24_U | 333 | 15 | 3 | 1 | 7.5 |
| SCWR24_U | 334 | 15 | 2 | 0 | 3   |
| SCWR24_U | 335 | 15 | 2 | 0 | 3.5 |
| SCWR24_U | 336 | 15 | 1 | 0 | 1.5 |
| SCWR24_U | 337 | 15 | 3 | 1 | 6.5 |

|          |     |    |   |   |      |
|----------|-----|----|---|---|------|
| SCWR24_U | 338 | 15 | 3 | 1 | 7    |
| SCWR24_U | 339 | 15 | 1 | 0 | 1.5  |
| SCWR24_U | 340 | 15 | 2 | 0 | 3.5  |
| SCWR24_U | 341 | 15 | 3 | 0 | 5    |
| SCWR24_U | 342 | 15 | 1 | 0 | 1.5  |
| SCWR24_U | 343 | 15 | 1 | 0 | 1    |
| SCWR24_U | 344 | 15 | 1 | 0 | 1    |
| SCWR24_U | 345 | 15 | 1 | 0 | 2    |
| SCWR24_U | 346 | 15 | 2 | 0 | 3    |
| SCWR24_U | 347 | 15 | 1 | 0 | 1    |
| SCWR24_U | 348 | 15 | 2 | 0 | 4    |
| SCWR24_U | 349 | 15 | 1 | 0 | 1    |
| SCWR24_U | 350 | 15 | 2 | 0 | 3    |
| SCWR24_U | 260 | 20 | 2 | 0 | 2.5  |
| SCWR24_U | 261 | 20 | 3 | 1 | 10.5 |
| SCWR24_U | 262 | 20 | 3 | 1 | 7    |
| SCWR24_U | 263 | 20 | 1 | 0 | 1    |
| SCWR24_U | 264 | 20 | 1 | 0 | 1    |
| SCWR24_U | 265 | 20 | 1 | 0 | 1.5  |
| SCWR24_U | 266 | 20 | 2 | 0 | 2.5  |
| SCWR24_U | 267 | 20 | 3 | 1 | 9    |
| SCWR24_U | 268 | 20 | 3 | 0 | 5    |
| SCWR24_U | 269 | 20 | 1 | 0 | 1    |
| SCWR24_U | 270 | 20 | 3 | 0 | 6    |
| SCWR24_U | 271 | 20 | 3 | 0 | 5    |
| SCWR24_U | 272 | 20 | 3 | 0 | 5.5  |
| SCWR24_U | 273 | 20 | 3 | 0 | 4.5  |
| SCWR24_U | 274 | 20 | 3 | 1 | 5    |
| SCWR24_U | 275 | 20 | 3 | 0 | 5.5  |
| SCWR24_U | 276 | 20 | 3 | 0 | 9    |
| SCWR24_U | 277 | 20 | 2 | 0 | 3    |
| SCWR24_U | 278 | 20 | 3 | 0 | 6    |
| SCWR24_U | 279 | 20 | 3 | 1 | 4.5  |
| SCWR24_U | 280 | 20 | 1 | 0 | 1    |
| SCWR24_U | 281 | 20 | 1 | 0 | 2    |
| SCWR24_U | 282 | 20 | 3 | 0 | 7    |
| SCWR24_U | 283 | 20 | 2 | 0 | 2.5  |
| SCWR24_U | 284 | 20 | 3 | 0 | 8    |
| SCWR24_U | 285 | 20 | 3 | 0 | 5    |
| SCWR24_U | 286 | 20 | 1 | 0 | 0.5  |
| SCWR24_U | 287 | 20 | 1 | 0 | 1    |

|          |     |    |   |   |     |
|----------|-----|----|---|---|-----|
| SCWR24_U | 288 | 20 | 3 | 0 | 5.5 |
| SCWR24_U | 289 | 20 | 3 | 1 | 8   |
| SCWR24_U | 290 | 20 | 3 | 0 | 6   |
| SCWR24_U | 291 | 20 | 1 | 0 | 2   |
| SCWR24_U | 292 | 20 | 3 | 1 | 6   |
| SCWR24_U | 293 | 20 | 3 | 0 | 4.5 |
| SCWR24_U | 294 | 20 | 3 | 0 | 5   |
| SCWR24_U | 295 | 20 | 1 | 0 | 0.5 |
| SCWR24_U | 296 | 20 | 3 | 0 | 5   |
| SCWR24_U | 297 | 20 | 1 | 0 | 1   |
| SCWR24_U | 298 | 20 | 1 | 0 | 2   |
| SCWR24_U | 299 | 20 | 1 | 0 | 1   |
| SCWR24_U | 300 | 20 | 3 | 0 | 6.5 |
| SCWR24_U | 304 | 20 | 3 | 0 | 5   |
| SCWR24_U | 305 | 20 | 1 | 0 | 0.5 |
| SCWR24_U | 306 | 20 | 3 | 0 | 7.5 |
| SCWR24_U | 307 | 20 | 2 | 0 | 4   |
| SCWR24_U | 308 | 20 | 1 | 0 | 1.5 |
| SCWR24_U | 309 | 20 | 3 | 0 | 5   |
| SCWR24_U | 310 | 20 | 3 | 0 | 4.5 |
| SCWR24_U | 311 | 20 | 2 | 0 | 3.5 |
| SCWR24_U | 312 | 20 | 1 | 0 | 2   |
| SCWR24_U | 313 | 20 | 3 | 0 | 8.5 |
| SCWR24_U | 314 | 20 | 1 | 0 | 1   |
| SCWR24_U | 315 | 20 | 3 | 1 | 6   |
| SCWR24_U | 316 | 20 | 3 | 1 | 9.5 |
| SCWR24_U | 317 | 20 | 1 | 0 | 1   |
| SCWR24_U | 318 | 20 | 1 | 0 | 1   |
| SCWR24_U | 319 | 20 | 1 | 0 | 1.5 |
| SCWR24_U | 320 | 20 | 3 | 0 | 7.5 |
| SCWR24_U | 321 | 20 | 3 | 0 | 4.5 |
| SCWR24_U | 322 | 20 | 1 | 0 | 1.5 |
| SCWR24_U | 323 | 20 | 3 | 0 | 6   |
| SCWR24_U | 324 | 20 | 3 | 0 | 5.5 |
| SCWR24_U | 325 | 20 | 2 | 0 | 3   |
| SCWR24_U | 326 | 20 | 1 | 0 | 1.5 |
| SCWR24_U | 327 | 20 | 3 | 0 | 4.5 |
| SCWR24_U | 328 | 20 | 3 | 0 | 5.5 |
| SCWR24_U | 329 | 20 | 2 | 0 | 2.5 |
| SCWR24_U | 330 | 20 | 3 | 0 | 7.5 |
| SCWR24_U | 331 | 20 | 1 | 0 | 0.5 |



|           |     |    |   |   |     |
|-----------|-----|----|---|---|-----|
| SCWR24_U  | 332 | 20 | 3 | 0 | 6.5 |
| SCWR24_U  | 333 | 20 | 3 | 1 | 7.5 |
| SCWR24_U  | 334 | 20 | 2 | 0 | 3   |
| SCWR24_U  | 335 | 20 | 2 | 0 | 3.5 |
| SCWR24_U  | 336 | 20 | 1 | 0 | 1.5 |
| SCWR24_U  | 337 | 20 | 3 | 1 | 6.5 |
| SCWR24_U  | 338 | 20 | 3 | 0 | 7   |
| SCWR24_U  | 339 | 20 | 1 | 0 | 1.5 |
| SCWR24_U  | 340 | 20 | 2 | 0 | 3.5 |
| SCWR24_U  | 341 | 20 | 3 | 0 | 5   |
| SCWR24_U  | 342 | 20 | 1 | 0 | 1.5 |
| SCWR24_U  | 343 | 20 | 1 | 0 | 1   |
| SCWR24_U  | 344 | 20 | 1 | 0 | 1   |
| SCWR24_U  | 345 | 20 | 1 | 0 | 2   |
| SCWR24_U  | 346 | 20 | 2 | 0 | 3   |
| SCWR24_U  | 347 | 20 | 1 | 0 | 1   |
| SCWR24_U  | 348 | 20 | 2 | 0 | 4   |
| SCWR24_U  | 349 | 20 | 1 | 0 | 1   |
| SCWR24_U  | 350 | 20 | 2 | 0 | 3   |
| SCWR24A_F | 354 | 10 | 3 | 1 | 5.5 |
| SCWR24A_F | 355 | 10 | 3 | 1 | 9   |
| SCWR24A_F | 356 | 10 | 3 | 0 | 7.5 |
| SCWR24A_F | 357 | 10 | 3 | 1 | 5.5 |
| SCWR24A_F | 358 | 10 | 1 | 0 | 1   |
| SCWR24A_F | 359 | 10 | 1 | 0 | 1   |
| SCWR24A_F | 360 | 10 | 1 | 0 | 2   |
| SCWR24A_F | 361 | 10 | 1 | 0 | 1.5 |
| SCWR24A_F | 362 | 10 | 3 | 0 | 7.5 |
| SCWR24A_F | 363 | 10 | 1 | 0 | 1.5 |
| SCWR24A_F | 364 | 10 | 2 | 0 | 2.5 |
| SCWR24A_F | 365 | 10 | 1 | 0 | 1.5 |
| SCWR24A_F | 366 | 10 | 1 | 0 | 2   |
| SCWR24A_F | 367 | 10 | 1 | 0 | 1.5 |
| SCWR24A_F | 368 | 10 | 3 | 1 | 5   |
| SCWR24A_F | 369 | 10 | 1 | 0 | 2   |
| SCWR24A_F | 370 | 10 | 3 | 1 | 4.5 |
| SCWR24A_F | 354 | 15 | 3 | 1 | 5.5 |
| SCWR24A_F | 355 | 15 | 3 | 1 | 9   |
| SCWR24A_F | 356 | 15 | 3 | 0 | 7.5 |
| SCWR24A_F | 357 | 15 | 3 | 0 | 5.5 |
| SCWR24A_F | 358 | 15 | 1 | 0 | 1   |

|           |     |    |   |   |     |
|-----------|-----|----|---|---|-----|
| SCWR24A_F | 359 | 15 | 1 | 0 | 1   |
| SCWR24A_F | 360 | 15 | 1 | 0 | 2   |
| SCWR24A_F | 361 | 15 | 1 | 0 | 1.5 |
| SCWR24A_F | 362 | 15 | 3 | 0 | 7.5 |
| SCWR24A_F | 363 | 15 | 1 | 0 | 1.5 |
| SCWR24A_F | 364 | 15 | 2 | 0 | 2.5 |
| SCWR24A_F | 365 | 15 | 1 | 0 | 1.5 |
| SCWR24A_F | 366 | 15 | 1 | 0 | 2   |
| SCWR24A_F | 367 | 15 | 1 | 0 | 1.5 |
| SCWR24A_F | 368 | 15 | 3 | 0 | 5   |
| SCWR24A_F | 369 | 15 | 1 | 0 | 2   |
| SCWR24A_F | 370 | 15 | 3 | 0 | 4.5 |
| SCWR24A_F | 354 | 20 | 3 | 0 | 5.5 |
| SCWR24A_F | 355 | 20 | 3 | 1 | 9   |
| SCWR24A_F | 356 | 20 | 3 | 0 | 7.5 |
| SCWR24A_F | 357 | 20 | 3 | 0 | 5.5 |
| SCWR24A_F | 358 | 20 | 1 | 0 | 1   |
| SCWR24A_F | 359 | 20 | 1 | 0 | 1   |
| SCWR24A_F | 360 | 20 | 1 | 0 | 2   |
| SCWR24A_F | 361 | 20 | 1 | 0 | 1.5 |
| SCWR24A_F | 362 | 20 | 3 | 0 | 7.5 |
| SCWR24A_F | 363 | 20 | 1 | 0 | 1.5 |
| SCWR24A_F | 364 | 20 | 2 | 0 | 2.5 |
| SCWR24A_F | 365 | 20 | 1 | 0 | 1.5 |
| SCWR24A_F | 366 | 20 | 1 | 0 | 2   |
| SCWR24A_F | 367 | 20 | 1 | 0 | 1.5 |
| SCWR24A_F | 368 | 20 | 3 | 0 | 5   |
| SCWR24A_F | 369 | 20 | 1 | 0 | 2   |
| SCWR24A_F | 370 | 20 | 3 | 0 | 4.5 |
| SCWR24A_U | 372 | 10 | 2 | 0 | 2.5 |
| SCWR24A_U | 373 | 10 | 3 | 1 | 8   |
| SCWR24A_U | 374 | 10 | 3 | 1 | 7   |
| SCWR24A_U | 375 | 10 | 3 | 1 | 5.5 |
| SCWR24A_U | 376 | 10 | 2 | 1 | 4   |
| SCWR24A_U | 377 | 10 | 3 | 1 | 8   |
| SCWR24A_U | 378 | 10 | 3 | 1 | 8   |
| SCWR24A_U | 379 | 10 | 1 | 0 | 2   |
| SCWR24A_U | 380 | 10 | 1 | 0 | 1.5 |
| SCWR24A_U | 381 | 10 | 3 | 1 | 7.5 |
| SCWR24A_U | 382 | 10 | 2 | 1 | 3.5 |
| SCWR24A_U | 387 | 10 | 3 | 1 | 5   |

|           |     |    |   |   |     |
|-----------|-----|----|---|---|-----|
| SCWR24A_U | 388 | 10 | 3 | 1 | 7.5 |
| SCWR24A_U | 372 | 15 | 2 | 0 | 2.5 |
| SCWR24A_U | 373 | 15 | 3 | 1 | 8   |
| SCWR24A_U | 374 | 15 | 3 | 1 | 7   |
| SCWR24A_U | 375 | 15 | 3 | 1 | 5.5 |
| SCWR24A_U | 376 | 15 | 2 | 0 | 4   |
| SCWR24A_U | 377 | 15 | 3 | 1 | 8   |
| SCWR24A_U | 378 | 15 | 3 | 1 | 8   |
| SCWR24A_U | 379 | 15 | 1 | 0 | 2   |
| SCWR24A_U | 380 | 15 | 1 | 0 | 1.5 |
| SCWR24A_U | 381 | 15 | 3 | 1 | 7.5 |
| SCWR24A_U | 382 | 15 | 2 | 1 | 3.5 |
| SCWR24A_U | 387 | 15 | 3 | 0 | 5   |
| SCWR24A_U | 388 | 15 | 3 | 0 | 7.5 |
| SCWR24A_U | 372 | 20 | 2 | 0 | 2.5 |
| SCWR24A_U | 373 | 20 | 3 | 0 | 8   |
| SCWR24A_U | 374 | 20 | 3 | 0 | 7   |
| SCWR24A_U | 375 | 20 | 3 | 0 | 5.5 |
| SCWR24A_U | 376 | 20 | 2 | 0 | 4   |
| SCWR24A_U | 377 | 20 | 3 | 0 | 8   |
| SCWR24A_U | 378 | 20 | 3 | 0 | 8   |
| SCWR24A_U | 379 | 20 | 1 | 0 | 2   |
| SCWR24A_U | 380 | 20 | 1 | 0 | 1.5 |
| SCWR24A_U | 381 | 20 | 3 | 1 | 7.5 |
| SCWR24A_U | 382 | 20 | 2 | 0 | 3.5 |
| SCWR24A_U | 387 | 20 | 3 | 1 | 5   |
| SCWR24A_U | 388 | 20 | 3 | 1 | 7.5 |
| SCWR26_F  | 394 | 10 | 3 | 1 | 4.5 |
| SCWR26_F  | 395 | 10 | 2 | 1 | 3   |
| SCWR26_F  | 396 | 10 | 2 | 0 | 3   |
| SCWR26_F  | 397 | 10 | 3 | 1 | 7   |
| SCWR26_F  | 398 | 10 | 3 | 1 | 7.5 |
| SCWR26_F  | 400 | 10 | 2 | 0 | 2.5 |
| SCWR26_F  | 401 | 10 | 2 | 0 | 4   |
| SCWR26_F  | 402 | 10 | 1 | 0 | 1.5 |
| SCWR26_F  | 403 | 10 | 3 | 1 | 4.5 |
| SCWR26_F  | 404 | 10 | 3 | 1 | 4.5 |
| SCWR26_F  | 405 | 10 | 3 | 0 | 5   |
| SCWR26_F  | 406 | 10 | 1 | 0 | 2   |
| SCWR26_F  | 407 | 10 | 2 | 0 | 3   |
| SCWR26_F  | 408 | 10 | 3 | 1 | 7.5 |

|          |     |    |   |   |     |
|----------|-----|----|---|---|-----|
| SCWR26_F | 409 | 10 | 1 | 0 | 1.5 |
| SCWR26_F | 410 | 10 | 3 | 0 | 4.5 |
| SCWR26_F | 411 | 10 | 1 | 0 | 1.5 |
| SCWR26_F | 412 | 10 | 1 | 0 | 1   |
| SCWR26_F | 413 | 10 | 1 | 1 | 2   |
| SCWR26_F | 414 | 10 | 2 | 0 | 3.5 |
| SCWR26_F | 415 | 10 | 2 | 1 | 2.5 |
| SCWR26_F | 416 | 10 | 1 | 0 | 1.5 |
| SCWR26_F | 417 | 10 | 2 | 0 | 3   |
| SCWR26_F | 418 | 10 | 2 | 0 | 3   |
| SCWR26_F | 419 | 10 | 3 | 1 | 7.5 |
| SCWR26_F | 420 | 10 | 2 | 0 | 2.5 |
| SCWR26_F | 421 | 10 | 3 | 0 | 6   |
| SCWR26_F | 422 | 10 | 2 | 1 | 3.5 |
| SCWR26_F | 423 | 10 | 1 | 0 | 2   |
| SCWR26_F | 424 | 10 | 1 | 0 | 2   |
| SCWR26_F | 425 | 10 | 3 | 0 | 6.5 |
| SCWR26_F | 426 | 10 | 2 | 0 | 2.5 |
| SCWR26_F | 427 | 10 | 1 | 0 | 1   |
| SCWR26_F | 428 | 10 | 1 | 0 | 1   |
| SCWR26_F | 429 | 10 | 2 | 0 | 4   |
| SCWR26_F | 430 | 10 | 3 | 1 | 5   |
| SCWR26_F | 431 | 10 | 3 | 1 | 5.5 |
| SCWR26_F | 432 | 10 | 3 | 1 | 6   |
| SCWR26_F | 433 | 10 | 2 | 0 | 2.5 |
| SCWR26_F | 434 | 10 | 1 | 0 | 2   |
| SCWR26_F | 394 | 15 | 3 | 0 | 4.5 |
| SCWR26_F | 395 | 15 | 2 | 0 | 3   |
| SCWR26_F | 396 | 15 | 2 | 0 | 3   |
| SCWR26_F | 397 | 15 | 3 | 0 | 7   |
| SCWR26_F | 398 | 15 | 3 | 0 | 7.5 |
| SCWR26_F | 400 | 15 | 2 | 0 | 2.5 |
| SCWR26_F | 401 | 15 | 2 | 0 | 4   |
| SCWR26_F | 402 | 15 | 1 | 0 | 1.5 |
| SCWR26_F | 403 | 15 | 3 | 0 | 4.5 |
| SCWR26_F | 404 | 15 | 3 | 0 | 4.5 |
| SCWR26_F | 405 | 15 | 3 | 0 | 5   |
| SCWR26_F | 406 | 15 | 1 | 0 | 2   |
| SCWR26_F | 407 | 15 | 2 | 0 | 3   |
| SCWR26_F | 408 | 15 | 3 | 0 | 7.5 |
| SCWR26_F | 409 | 15 | 1 | 0 | 1.5 |

|          |     |    |   |   |     |
|----------|-----|----|---|---|-----|
| SCWR26_F | 410 | 15 | 3 | 0 | 4.5 |
| SCWR26_F | 411 | 15 | 1 | 0 | 1.5 |
| SCWR26_F | 412 | 15 | 1 | 0 | 1   |
| SCWR26_F | 413 | 15 | 1 | 0 | 2   |
| SCWR26_F | 414 | 15 | 2 | 0 | 3.5 |
| SCWR26_F | 415 | 15 | 2 | 1 | 2.5 |
| SCWR26_F | 416 | 15 | 1 | 0 | 1.5 |
| SCWR26_F | 417 | 15 | 2 | 0 | 3   |
| SCWR26_F | 418 | 15 | 2 | 0 | 3   |
| SCWR26_F | 419 | 15 | 3 | 1 | 7.5 |
| SCWR26_F | 420 | 15 | 2 | 0 | 2.5 |
| SCWR26_F | 421 | 15 | 3 | 0 | 6   |
| SCWR26_F | 422 | 15 | 2 | 0 | 3.5 |
| SCWR26_F | 423 | 15 | 1 | 0 | 2   |
| SCWR26_F | 424 | 15 | 1 | 0 | 2   |
| SCWR26_F | 425 | 15 | 3 | 0 | 6.5 |
| SCWR26_F | 426 | 15 | 2 | 0 | 2.5 |
| SCWR26_F | 427 | 15 | 1 | 0 | 1   |
| SCWR26_F | 428 | 15 | 1 | 0 | 1   |
| SCWR26_F | 429 | 15 | 2 | 0 | 4   |
| SCWR26_F | 430 | 15 | 3 | 0 | 5   |
| SCWR26_F | 431 | 15 | 3 | 1 | 5.5 |
| SCWR26_F | 432 | 15 | 3 | 0 | 6   |
| SCWR26_F | 433 | 15 | 2 | 0 | 2.5 |
| SCWR26_F | 434 | 15 | 1 | 0 | 2   |
| SCWR26_F | 394 | 20 | 3 | 0 | 4.5 |
| SCWR26_F | 395 | 20 | 2 | 0 | 3   |
| SCWR26_F | 396 | 20 | 2 | 0 | 3   |
| SCWR26_F | 397 | 20 | 3 | 0 | 7   |
| SCWR26_F | 398 | 20 | 3 | 0 | 7.5 |
| SCWR26_F | 400 | 20 | 2 | 0 | 2.5 |
| SCWR26_F | 401 | 20 | 2 | 0 | 4   |
| SCWR26_F | 402 | 20 | 1 | 0 | 1.5 |
| SCWR26_F | 403 | 20 | 3 | 0 | 4.5 |
| SCWR26_F | 404 | 20 | 3 | 0 | 4.5 |
| SCWR26_F | 405 | 20 | 3 | 0 | 5   |
| SCWR26_F | 406 | 20 | 1 | 0 | 2   |
| SCWR26_F | 407 | 20 | 2 | 0 | 3   |
| SCWR26_F | 408 | 20 | 3 | 0 | 7.5 |
| SCWR26_F | 409 | 20 | 1 | 0 | 1.5 |
| SCWR26_F | 410 | 20 | 3 | 0 | 4.5 |

|          |     |    |   |   |     |
|----------|-----|----|---|---|-----|
| SCWR26_F | 411 | 20 | 1 | 0 | 1.5 |
| SCWR26_F | 412 | 20 | 1 | 0 | 1   |
| SCWR26_F | 413 | 20 | 1 | 0 | 2   |
| SCWR26_F | 414 | 20 | 2 | 0 | 3.5 |
| SCWR26_F | 415 | 20 | 2 | 0 | 2.5 |
| SCWR26_F | 416 | 20 | 1 | 0 | 1.5 |
| SCWR26_F | 417 | 20 | 2 | 0 | 3   |
| SCWR26_F | 418 | 20 | 2 | 0 | 3   |
| SCWR26_F | 419 | 20 | 3 | 0 | 7.5 |
| SCWR26_F | 420 | 20 | 2 | 0 | 2.5 |
| SCWR26_F | 421 | 20 | 3 | 0 | 6   |
| SCWR26_F | 422 | 20 | 2 | 0 | 3.5 |
| SCWR26_F | 423 | 20 | 1 | 0 | 2   |
| SCWR26_F | 424 | 20 | 1 | 0 | 2   |
| SCWR26_F | 425 | 20 | 3 | 0 | 6.5 |
| SCWR26_F | 426 | 20 | 2 | 0 | 2.5 |
| SCWR26_F | 427 | 20 | 1 | 0 | 1   |
| SCWR26_F | 428 | 20 | 1 | 0 | 1   |
| SCWR26_F | 429 | 20 | 2 | 0 | 4   |
| SCWR26_F | 430 | 20 | 3 | 0 | 5   |
| SCWR26_F | 431 | 20 | 3 | 1 | 5.5 |
| SCWR26_F | 432 | 20 | 3 | 0 | 6   |
| SCWR26_F | 433 | 20 | 2 | 0 | 2.5 |
| SCWR26_F | 434 | 20 | 1 | 0 | 2   |
| SCWR26_U | 436 | 10 | 3 | 1 | 4.5 |
| SCWR26_U | 437 | 10 | 3 | 1 | 5   |
| SCWR26_U | 438 | 10 | 2 | 1 | 4   |
| SCWR26_U | 439 | 10 | 2 | 1 | 3.5 |
| SCWR26_U | 440 | 10 | 1 | 0 | 1   |
| SCWR26_U | 441 | 10 | 3 | 1 | 8   |
| SCWR26_U | 442 | 10 | 1 | 0 | 2   |
| SCWR26_U | 443 | 10 | 2 | 0 | 3   |
| SCWR26_U | 444 | 10 | 3 | 1 | 5.5 |
| SCWR26_U | 445 | 10 | 3 | 1 | 6   |
| SCWR26_U | 446 | 10 | 3 | 0 | 5   |
| SCWR26_U | 447 | 10 | 3 | 1 | 10  |
| SCWR26_U | 448 | 10 | 3 | 0 | 5   |
| SCWR26_U | 449 | 10 | 2 | 0 | 3.5 |
| SCWR26_U | 450 | 10 | 3 | 0 | 5.5 |
| SCWR26_U | 451 | 10 | 3 | 0 | 5.5 |
| SCWR26_U | 452 | 10 | 3 | 1 | 8   |

|          |     |    |   |   |     |
|----------|-----|----|---|---|-----|
| SCWR26_U | 453 | 10 | 3 | 0 | 6   |
| SCWR26_U | 454 | 10 | 3 | 1 | 14  |
| SCWR26_U | 455 | 10 | 3 | 0 | 5   |
| SCWR26_U | 456 | 10 | 2 | 0 | 2.5 |
| SCWR26_U | 457 | 10 | 1 | 1 | 2   |
| SCWR26_U | 458 | 10 | 2 | 0 | 3.5 |
| SCWR26_U | 459 | 10 | 2 | 0 | 4   |
| SCWR26_U | 460 | 10 | 1 | 0 | 1   |
| SCWR26_U | 461 | 10 | 1 | 0 | 1.5 |
| SCWR26_U | 436 | 15 | 3 | 0 | 4.5 |
| SCWR26_U | 437 | 15 | 3 | 0 | 5   |
| SCWR26_U | 438 | 15 | 2 | 0 | 4   |
| SCWR26_U | 439 | 15 | 2 | 0 | 3.5 |
| SCWR26_U | 440 | 15 | 1 | 0 | 1   |
| SCWR26_U | 441 | 15 | 3 | 1 | 8   |
| SCWR26_U | 442 | 15 | 1 | 0 | 2   |
| SCWR26_U | 443 | 15 | 2 | 0 | 3   |
| SCWR26_U | 444 | 15 | 3 | 0 | 5.5 |
| SCWR26_U | 445 | 15 | 3 | 1 | 6   |
| SCWR26_U | 446 | 15 | 3 | 0 | 5   |
| SCWR26_U | 447 | 15 | 3 | 1 | 10  |
| SCWR26_U | 448 | 15 | 3 | 0 | 5   |
| SCWR26_U | 449 | 15 | 2 | 0 | 3.5 |
| SCWR26_U | 450 | 15 | 3 | 0 | 5.5 |
| SCWR26_U | 451 | 15 | 3 | 1 | 5.5 |
| SCWR26_U | 452 | 15 | 3 | 1 | 8   |
| SCWR26_U | 453 | 15 | 3 | 0 | 6   |
| SCWR26_U | 454 | 15 | 3 | 1 | 14  |
| SCWR26_U | 455 | 15 | 3 | 0 | 5   |
| SCWR26_U | 456 | 15 | 2 | 0 | 2.5 |
| SCWR26_U | 457 | 15 | 1 | 0 | 2   |
| SCWR26_U | 458 | 15 | 2 | 0 | 3.5 |
| SCWR26_U | 459 | 15 | 2 | 0 | 4   |
| SCWR26_U | 460 | 15 | 1 | 0 | 1   |
| SCWR26_U | 461 | 15 | 1 | 0 | 1.5 |
| SCWR26_U | 436 | 20 | 3 | 0 | 4.5 |
| SCWR26_U | 437 | 20 | 3 | 0 | 5   |
| SCWR26_U | 438 | 20 | 2 | 0 | 4   |
| SCWR26_U | 439 | 20 | 2 | 0 | 3.5 |
| SCWR26_U | 440 | 20 | 1 | 0 | 1   |
| SCWR26_U | 441 | 20 | 3 | 0 | 8   |

|                 |     |    |   |   |     |
|-----------------|-----|----|---|---|-----|
| SCWR26_U        | 442 | 20 | 1 | 0 | 2   |
| SCWR26_U        | 443 | 20 | 2 | 0 | 3   |
| SCWR26_U        | 444 | 20 | 3 | 0 | 5.5 |
| SCWR26_U        | 445 | 20 | 3 | 0 | 6   |
| SCWR26_U        | 446 | 20 | 3 | 0 | 5   |
| SCWR26_U        | 447 | 20 | 3 | 1 | 10  |
| SCWR26_U        | 448 | 20 | 3 | 0 | 5   |
| SCWR26_U        | 449 | 20 | 2 | 0 | 3.5 |
| SCWR26_U        | 450 | 20 | 3 | 0 | 5.5 |
| SCWR26_U        | 451 | 20 | 3 | 0 | 5.5 |
| SCWR26_U        | 452 | 20 | 3 | 0 | 8   |
| SCWR26_U        | 453 | 20 | 3 | 0 | 6   |
| SCWR26_U        | 454 | 20 | 3 | 1 | 14  |
| SCWR26_U        | 455 | 20 | 3 | 0 | 5   |
| SCWR26_U        | 456 | 20 | 2 | 0 | 2.5 |
| SCWR26_U        | 457 | 20 | 1 | 1 | 2   |
| SCWR26_U        | 458 | 20 | 2 | 0 | 3.5 |
| SCWR26_U        | 459 | 20 | 2 | 0 | 4   |
| SCWR26_U        | 460 | 20 | 1 | 0 | 1   |
| SCWR26_U        | 461 | 20 | 1 | 0 | 1.5 |
| UpperCoalMine_U | 462 | 10 | 3 | 1 | 6   |
| UpperCoalMine_U | 463 | 10 | 3 | 1 | 6.5 |
| UpperCoalMine_U | 462 | 15 | 3 | 0 | 6   |
| UpperCoalMine_U | 463 | 15 | 3 | 1 | 6.5 |
| UpperCoalMine_U | 462 | 20 | 3 | 0 | 6   |
| UpperCoalMine_U | 463 | 20 | 3 | 0 | 6.5 |
| WillowSeepRd_F  | 464 | 10 | 2 | 0 | 3   |
| WillowSeepRd_F  | 465 | 10 | 3 | 0 | 5   |
| WillowSeepRd_F  | 466 | 10 | 1 | 0 | 2   |
| WillowSeepRd_F  | 467 | 10 | 2 | 0 | 3   |
| WillowSeepRd_F  | 468 | 10 | 3 | 0 | 5   |
| WillowSeepRd_F  | 469 | 10 | 2 | 0 | 3   |
| WillowSeepRd_F  | 472 | 10 | 3 | 0 | 4.5 |
| WillowSeepRd_F  | 473 | 10 | 2 | 0 | 2.5 |
| WillowSeepRd_F  | 474 | 10 | 2 | 0 | 2.5 |
| WillowSeepRd_F  | 475 | 10 | 2 | 1 | 3.5 |
| WillowSeepRd_F  | 476 | 10 | 1 | 0 | 1   |
| WillowSeepRd_F  | 477 | 10 | 3 | 0 | 4.5 |
| WillowSeepRd_F  | 478 | 10 | 2 | 1 | 4   |
| WillowSeepRd_F  | 479 | 10 | 1 | 0 | 2   |
| WillowSeepRd_F  | 480 | 10 | 2 | 0 | 3   |



|                |     |    |   |   |     |
|----------------|-----|----|---|---|-----|
| WillowSeepRd_F | 481 | 10 | 3 | 0 | 5.5 |
| WillowSeepRd_F | 482 | 10 | 2 | 0 | 3   |
| WillowSeepRd_F | 483 | 10 | 2 | 0 | 3.5 |
| WillowSeepRd_F | 484 | 10 | 3 | 0 | 5   |
| WillowSeepRd_F | 485 | 10 | 2 | 0 | 3.5 |
| WillowSeepRd_F | 486 | 10 | 3 | 0 | 4.5 |
| WillowSeepRd_F | 487 | 10 | 3 | 0 | 4.5 |
| WillowSeepRd_F | 488 | 10 | 2 | 0 | 4   |
| WillowSeepRd_F | 489 | 10 | 2 | 0 | 2.5 |
| WillowSeepRd_F | 490 | 10 | 2 | 0 | 3   |
| WillowSeepRd_F | 491 | 10 | 2 | 0 | 4   |
| WillowSeepRd_F | 492 | 10 | 2 | 0 | 3.5 |
| WillowSeepRd_F | 493 | 10 | 3 | 1 | 5   |
| WillowSeepRd_F | 494 | 10 | 2 | 0 | 2.5 |
| WillowSeepRd_F | 495 | 10 | 2 | 0 | 4   |
| WillowSeepRd_F | 496 | 10 | 3 | 0 | 5.5 |
| WillowSeepRd_F | 497 | 10 | 2 | 0 | 3.5 |
| WillowSeepRd_F | 498 | 10 | 1 | 0 | 2   |
| WillowSeepRd_F | 499 | 10 | 1 | 0 | 1   |
| WillowSeepRd_F | 500 | 10 | 1 | 0 | 1.5 |
| WillowSeepRd_F | 501 | 10 | 2 | 0 | 3.5 |
| WillowSeepRd_F | 502 | 10 | 3 | 0 | 5.5 |
| WillowSeepRd_F | 503 | 10 | 2 | 0 | 4   |
| WillowSeepRd_F | 504 | 10 | 2 | 0 | 2.5 |
| WillowSeepRd_F | 505 | 10 | 2 | 0 | 3   |
| WillowSeepRd_F | 506 | 10 | 2 | 0 | 2.5 |
| WillowSeepRd_F | 507 | 10 | 2 | 1 | 4   |
| WillowSeepRd_F | 508 | 10 | 2 | 0 | 2.5 |
| WillowSeepRd_F | 509 | 10 | 2 | 0 | 2.5 |
| WillowSeepRd_F | 510 | 10 | 1 | 0 | 2   |
| WillowSeepRd_F | 511 | 10 | 2 | 0 | 3   |
| WillowSeepRd_F | 512 | 10 | 2 | 0 | 4   |
| WillowSeepRd_F | 513 | 10 | 2 | 0 | 4   |
| WillowSeepRd_F | 517 | 10 | 1 | 0 | 2   |
| WillowSeepRd_F | 518 | 10 | 3 | 1 | 5   |
| WillowSeepRd_F | 464 | 15 | 2 | 0 | 3   |
| WillowSeepRd_F | 465 | 15 | 3 | 0 | 5   |
| WillowSeepRd_F | 466 | 15 | 1 | 0 | 2   |
| WillowSeepRd_F | 467 | 15 | 2 | 0 | 3   |
| WillowSeepRd_F | 468 | 15 | 3 | 0 | 5   |
| WillowSeepRd_F | 469 | 15 | 2 | 0 | 3   |

|                |     |    |   |   |     |
|----------------|-----|----|---|---|-----|
| WillowSeepRd_F | 472 | 15 | 3 | 0 | 4.5 |
| WillowSeepRd_F | 473 | 15 | 2 | 0 | 2.5 |
| WillowSeepRd_F | 474 | 15 | 2 | 0 | 2.5 |
| WillowSeepRd_F | 475 | 15 | 2 | 1 | 3.5 |
| WillowSeepRd_F | 476 | 15 | 1 | 0 | 1   |
| WillowSeepRd_F | 477 | 15 | 3 | 0 | 4.5 |
| WillowSeepRd_F | 478 | 15 | 2 | 0 | 4   |
| WillowSeepRd_F | 479 | 15 | 1 | 0 | 2   |
| WillowSeepRd_F | 480 | 15 | 2 | 0 | 3   |
| WillowSeepRd_F | 481 | 15 | 3 | 0 | 5.5 |
| WillowSeepRd_F | 482 | 15 | 2 | 0 | 3   |
| WillowSeepRd_F | 483 | 15 | 2 | 0 | 3.5 |
| WillowSeepRd_F | 484 | 15 | 3 | 0 | 5   |
| WillowSeepRd_F | 485 | 15 | 2 | 0 | 3.5 |
| WillowSeepRd_F | 486 | 15 | 3 | 0 | 4.5 |
| WillowSeepRd_F | 487 | 15 | 3 | 0 | 4.5 |
| WillowSeepRd_F | 488 | 15 | 2 | 0 | 4   |
| WillowSeepRd_F | 489 | 15 | 2 | 0 | 2.5 |
| WillowSeepRd_F | 490 | 15 | 2 | 0 | 3   |
| WillowSeepRd_F | 491 | 15 | 2 | 0 | 4   |
| WillowSeepRd_F | 492 | 15 | 2 | 0 | 3.5 |
| WillowSeepRd_F | 493 | 15 | 3 | 0 | 5   |
| WillowSeepRd_F | 494 | 15 | 2 | 0 | 2.5 |
| WillowSeepRd_F | 495 | 15 | 2 | 0 | 4   |
| WillowSeepRd_F | 496 | 15 | 3 | 1 | 5.5 |
| WillowSeepRd_F | 497 | 15 | 2 | 0 | 3.5 |
| WillowSeepRd_F | 498 | 15 | 1 | 0 | 2   |
| WillowSeepRd_F | 499 | 15 | 1 | 0 | 1   |
| WillowSeepRd_F | 500 | 15 | 1 | 0 | 1.5 |
| WillowSeepRd_F | 501 | 15 | 2 | 0 | 3.5 |
| WillowSeepRd_F | 502 | 15 | 3 | 1 | 5.5 |
| WillowSeepRd_F | 503 | 15 | 2 | 0 | 4   |
| WillowSeepRd_F | 504 | 15 | 2 | 0 | 2.5 |
| WillowSeepRd_F | 505 | 15 | 2 | 0 | 3   |
| WillowSeepRd_F | 506 | 15 | 2 | 0 | 2.5 |
| WillowSeepRd_F | 507 | 15 | 2 | 0 | 4   |
| WillowSeepRd_F | 508 | 15 | 2 | 0 | 2.5 |
| WillowSeepRd_F | 509 | 15 | 2 | 0 | 2.5 |
| WillowSeepRd_F | 510 | 15 | 1 | 0 | 2   |
| WillowSeepRd_F | 511 | 15 | 2 | 0 | 3   |
| WillowSeepRd_F | 512 | 15 | 2 | 0 | 4   |

|                |     |    |   |   |     |
|----------------|-----|----|---|---|-----|
| WillowSeepRd_F | 513 | 15 | 2 | 0 | 4   |
| WillowSeepRd_F | 517 | 15 | 1 | 0 | 2   |
| WillowSeepRd_F | 518 | 15 | 3 | 0 | 5   |
| WillowSeepRd_F | 464 | 20 | 2 | 0 | 3   |
| WillowSeepRd_F | 465 | 20 | 3 | 0 | 5   |
| WillowSeepRd_F | 466 | 20 | 1 | 0 | 2   |
| WillowSeepRd_F | 467 | 20 | 2 | 0 | 3   |
| WillowSeepRd_F | 468 | 20 | 3 | 0 | 5   |
| WillowSeepRd_F | 469 | 20 | 2 | 0 | 3   |
| WillowSeepRd_F | 472 | 20 | 3 | 0 | 4.5 |
| WillowSeepRd_F | 473 | 20 | 2 | 0 | 2.5 |
| WillowSeepRd_F | 474 | 20 | 2 | 0 | 2.5 |
| WillowSeepRd_F | 475 | 20 | 2 | 0 | 3.5 |
| WillowSeepRd_F | 476 | 20 | 1 | 0 | 1   |
| WillowSeepRd_F | 477 | 20 | 3 | 0 | 4.5 |
| WillowSeepRd_F | 478 | 20 | 2 | 0 | 4   |
| WillowSeepRd_F | 479 | 20 | 1 | 0 | 2   |
| WillowSeepRd_F | 480 | 20 | 2 | 0 | 3   |
| WillowSeepRd_F | 481 | 20 | 3 | 0 | 5.5 |
| WillowSeepRd_F | 482 | 20 | 2 | 0 | 3   |
| WillowSeepRd_F | 483 | 20 | 2 | 0 | 3.5 |
| WillowSeepRd_F | 484 | 20 | 3 | 0 | 5   |
| WillowSeepRd_F | 485 | 20 | 2 | 0 | 3.5 |
| WillowSeepRd_F | 486 | 20 | 3 | 0 | 4.5 |
| WillowSeepRd_F | 487 | 20 | 3 | 0 | 4.5 |
| WillowSeepRd_F | 488 | 20 | 2 | 0 | 4   |
| WillowSeepRd_F | 489 | 20 | 2 | 0 | 2.5 |
| WillowSeepRd_F | 490 | 20 | 2 | 0 | 3   |
| WillowSeepRd_F | 491 | 20 | 2 | 0 | 4   |
| WillowSeepRd_F | 492 | 20 | 2 | 0 | 3.5 |
| WillowSeepRd_F | 493 | 20 | 3 | 0 | 5   |
| WillowSeepRd_F | 494 | 20 | 2 | 0 | 2.5 |
| WillowSeepRd_F | 495 | 20 | 2 | 0 | 4   |
| WillowSeepRd_F | 496 | 20 | 3 | 0 | 5.5 |
| WillowSeepRd_F | 497 | 20 | 2 | 0 | 3.5 |
| WillowSeepRd_F | 498 | 20 | 1 | 0 | 2   |
| WillowSeepRd_F | 499 | 20 | 1 | 0 | 1   |
| WillowSeepRd_F | 500 | 20 | 1 | 0 | 1.5 |
| WillowSeepRd_F | 501 | 20 | 2 | 0 | 3.5 |
| WillowSeepRd_F | 502 | 20 | 3 | 0 | 5.5 |
| WillowSeepRd_F | 503 | 20 | 2 | 0 | 4   |

|                |     |    |   |   |     |
|----------------|-----|----|---|---|-----|
| WillowSeepRd_F | 504 | 20 | 2 | 0 | 2.5 |
| WillowSeepRd_F | 505 | 20 | 2 | 0 | 3   |
| WillowSeepRd_F | 506 | 20 | 2 | 0 | 2.5 |
| WillowSeepRd_F | 507 | 20 | 2 | 0 | 4   |
| WillowSeepRd_F | 508 | 20 | 2 | 0 | 2.5 |
| WillowSeepRd_F | 509 | 20 | 2 | 0 | 2.5 |
| WillowSeepRd_F | 510 | 20 | 1 | 0 | 2   |
| WillowSeepRd_F | 511 | 20 | 2 | 0 | 3   |
| WillowSeepRd_F | 512 | 20 | 2 | 0 | 4   |
| WillowSeepRd_F | 513 | 20 | 2 | 0 | 4   |
| WillowSeepRd_F | 517 | 20 | 1 | 0 | 2   |
| WillowSeepRd_F | 518 | 20 | 3 | 0 | 5   |
