# Supplementary material
Source: MDPI journal article supplement (https://www.mdpi.com/2073-445X/11/5/655)
Supplement: s1 [file s1]

**Supplemental File S2:** Raw data used to model Wright fishhook cactus detection rates and counts. Columns are defined as follows: Site: Name of macro-plot; Altitude: Height in meters at which the drone survey was conducted; SC\_1: The number of size class 1 individuals that were confirmed in the macro-plot; SC\_2: The number of size class 2 individuals that were confirmed in the macro-plot; SC\_3: The number of size class 3 individuals that were confirmed in the macro-plot; Total: The total number of cacti that were confirmed in the macro-plot; A\_SC1: The actual number of size class 1 cacti that were present in the macro-plot ground census; A\_SC2: The actual number of size class 2 cacti that were present in the macro-plot ground census; A\_SC3: The actual number of size class 3 cacti that were present in the macro-plot ground census; A\_Total: The total number of cacti that were found in the macro-plot during the ground census; P\_SC1: The percent of size class 1 individuals that were confirmed ( $SC_1/A\_SC1$ ); P\_SC2: The percent of size class 2 individuals that were confirmed ( $SC_2/A\_SC2$ ); P\_SC3: The percent of size class 3 individuals that were confirmed ( $SC_3/A\_SC3$ ); P\_Total: The percent of Wright fishhook cacti that were confirmed ( $Total/A\_Total$ ).

| Site               | Altitude | SC_1 | SC_2 | SC_3 | Total | A_SC1 | A_SC2 | A_SC3 | A_Total | P_SC1    | P_SC2    | P_SC3    | P_Total  |
|--------------------|----------|------|------|------|-------|-------|-------|-------|---------|----------|----------|----------|----------|
| North Dry Valley F | 10       | 0    | 1    | 2    | 3     | 1     | 1     | 5     | 7       | 0        | 1        | 0.4      | 0.428571 |
| North Dry Valley U | 10       | 2    | 2    | 7    | 11    | 2     | 2     | 7     | 11      | 1        | 1        | 1        | 1        |
| SCWR 18D F         | 10       | 6    | 11   | 0    | 17    | 31    | 16    | 4     | 51      | 0.193548 | 0.6875   | 0        | 0.333333 |
| SCWR 18D U         | 10       | 6    | 11   | 4    | 21    | 29    | 19    | 8     | 56      | 0.206897 | 0.578947 | 0.5      | 0.375    |
| SCWR 24 F          | 10       | 2    | 1    | 20   | 23    | 33    | 26    | 36    | 95      | 0.060606 | 0.038462 | 0.555556 | 0.242105 |
| SCWR 24 U          | 10       | 0    | 6    | 38   | 44    | 31    | 14    | 43    | 88      | 0        | 0.428571 | 0.883721 | 0.5      |
| SCWR 24A F         | 10       | 0    | 0    | 7    | 7     | 9     | 1     | 7     | 17      | 0        | 0        | 1        | 0.411765 |
| SCWR 24A U         | 10       | 0    | 3    | 8    | 11    | 2     | 3     | 8     | 13      | 0        | 1        | 1        | 0.846154 |
| SCWR 26 F          | 10       | 1    | 3    | 10   | 14    | 12    | 14    | 14    | 40      | 0.083333 | 0.214286 | 0.714286 | 0.35     |
| SCWR 26 U          | 10       | 1    | 2    | 8    | 11    | 5     | 7     | 14    | 26      | 0.2      | 0.285714 | 0.571429 | 0.423077 |
| SCWR 2B F          | 10       | 0    | 4    | 4    | 8     | 1     | 5     | 6     | 12      | 0        | 0.8      | 0.666667 | 0.666667 |
| SCWR 2B U          | 10       | 0    | 1    | 3    | 4     | 3     | 4     | 5     | 12      | 0        | 0.25     | 0.6      | 0.333333 |
| Upper Coal Mine U  | 10       | 0    | 0    | 2    | 2     | 0     | 0     | 2     | 2       | 0        | 0        | 1        | 1        |
| Willow Seep Rd F   | 10       | 0    | 3    | 2    | 5     | 8     | 30    | 12    | 50      | 0        | 0.1      | 0.166667 | 0.1      |
| North Dry Valley F | 15       | 0    | 1    | 2    | 3     | 1     | 1     | 5     | 7       | 0        | 1        | 0.4      | 0.428571 |
| North Dry Valley U | 15       | 0    | 2    | 2    | 4     | 2     | 2     | 7     | 11      | 0        | 1        | 0.285714 | 0.363636 |
| SCWR 18D F         | 15       | 1    | 2    | 0    | 3     | 31    | 16    | 4     | 51      | 0.032258 | 0.125    | 0        | 0.058824 |
| SCWR 18D U         | 15       | 3    | 4    | 3    | 10    | 29    | 19    | 8     | 56      | 0.103448 | 0.210526 | 0.375    | 0.178571 |
| SCWR 24 F          | 15       | 1    | 0    | 10   | 11    | 33    | 26    | 36    | 95      | 0.030303 | 0        | 0.277778 | 0.115789 |
| SCWR 24 U          | 15       | 0    | 0    | 22   | 22    | 31    | 14    | 43    | 88      | 0        | 0        | 0.511628 | 0.25     |

|                    |    |   |   |    |    |    |    |    |    |          |          |          |          |
|--------------------|----|---|---|----|----|----|----|----|----|----------|----------|----------|----------|
| SCWR 24A F         | 15 | 0 | 0 | 4  | 4  | 9  | 1  | 7  | 17 | 0        | 0        | 0.571429 | 0.235294 |
| SCWR 24A U         | 15 | 0 | 1 | 7  | 8  | 2  | 3  | 8  | 13 | 0        | 0.333333 | 0.875    | 0.615385 |
| SCWR 26 F          | 15 | 0 | 1 | 2  | 3  | 12 | 14 | 14 | 40 | 0        | 0.071429 | 0.142857 | 0.075    |
| SCWR 26 U          | 15 | 0 | 0 | 6  | 6  | 5  | 7  | 14 | 26 | 0        | 0        | 0.428571 | 0.230769 |
| SCWR 2B F          | 15 | 0 | 2 | 4  | 6  | 1  | 5  | 6  | 12 | 0        | 0.4      | 0.666667 | 0.5      |
| SCWR 2B U          | 15 | 0 | 2 | 2  | 4  | 3  | 4  | 5  | 12 | 0        | 0.5      | 0.4      | 0.333333 |
| Upper Coal Mine U  | 15 | 0 | 0 | 2  | 2  | 0  | 0  | 2  | 2  | 0        | 0        | 1        | 1        |
| Willow Seep Rd F   | 15 | 0 | 1 | 2  | 3  | 8  | 30 | 12 | 50 | 0        | 0.033333 | 0.166667 | 0.06     |
| North Dry Valley F | 20 | 0 | 0 | 1  | 1  | 1  | 1  | 5  | 7  | 0        | 0        | 0.2      | 0.142857 |
| North Dry Valley U | 20 | 0 | 0 | 2  | 2  | 2  | 2  | 7  | 11 | 0        | 0        | 0.285714 | 0.181818 |
| SCWR 18D F         | 20 | 1 | 1 | 0  | 2  | 31 | 16 | 4  | 51 | 0.032258 | 0.0625   | 0        | 0.039216 |
| SCWR 18D U         | 20 | 0 | 2 | 3  | 5  | 29 | 19 | 8  | 56 | 0        | 0.105263 | 0.375    | 0.089286 |
| SCWR 24 F          | 20 | 0 | 0 | 6  | 6  | 33 | 26 | 36 | 95 | 0        | 0        | 0.166667 | 0.063158 |
| SCWR 24 U          | 20 | 0 | 0 | 12 | 12 | 31 | 14 | 43 | 88 | 0        | 0        | 0.27907  | 0.136364 |
| SCWR 24A F         | 20 | 0 | 0 | 3  | 3  | 9  | 1  | 7  | 17 | 0        | 0        | 0.428571 | 0.176471 |
| SCWR 24A U         | 20 | 0 | 0 | 4  | 4  | 2  | 3  | 8  | 13 | 0        | 0        | 0.5      | 0.307692 |
| SCWR 26 F          | 20 | 0 | 0 | 1  | 1  | 12 | 14 | 14 | 40 | 0        | 0        | 0.071429 | 0.025    |
| SCWR 26 U          | 20 | 1 | 0 | 2  | 3  | 5  | 7  | 14 | 26 | 0.2      | 0        | 0.142857 | 0.115385 |
| SCWR 2B F          | 20 | 0 | 0 | 3  | 3  | 1  | 5  | 6  | 12 | 0        | 0        | 0.5      | 0.25     |
| SCWR 2B U          | 20 | 0 | 0 | 2  | 2  | 3  | 4  | 5  | 12 | 0        | 0        | 0.4      | 0.166667 |
| Upper Coal Mine U  | 20 | 0 | 0 | 1  | 1  | 0  | 0  | 2  | 2  | 0        | 0        | 0.5      | 0.5      |
| Willow Seep Rd F   | 20 | 0 | 0 | 1  | 1  | 8  | 30 | 12 | 50 | 0        | 0        | 0.083333 | 0.02     |
